# Supplementary material for: Synthesis of 1,2,4-azadiphosphole derivatives based on vanadium-catalyzed [2+2+1] cycloaddition reactions of azobenzenes with phosphaalkynes
Source: Royal Society of Chemistry journal article supplement (doi:10.1039/d0ra02503h), 2020-01-01

**Synthesis of 1,2,4-Azadiphosphole Derivatives Based on Vanadium-Catalyzed [2+2+1]  
Cycloaddition Reactions of Azobenzenes with Phosphaalkynes**

Wenbin Liang,<sup>a</sup> Kazunari Nakajima<sup>\*b</sup> and Yoshiaki Nishibayashi<sup>\*a</sup>

<sup>a</sup> Department of Systems Innovation, School of Engineering, The University of Tokyo, Hongo, Bunkyo-ku, Tokyo, 113-8656 Japan.

<sup>b</sup> Frontier Research Center for Energy and Resources, School of Engineering, The University of Tokyo, Hongo, Bunkyo-ku, Tokyo, 113-8656 Japan.

## 1. General methods

<sup>1</sup>H NMR (400 MHz), <sup>13</sup>C NMR (100 MHz) and <sup>31</sup>P NMR (162 MHz) spectra were recorded on a JEOL Excalibur 400 spectrometer, and chemical shifts of <sup>31</sup>P NMR were referenced to an external standard of 85% H<sub>3</sub>PO<sub>4</sub>. Elemental analysis was performed at the Microanalytical Center of The University of Tokyo. Mass spectra were measured on a JEOL JMS-700 mass spectrometer. Gel permeation chromatography (GPC) was performed using a JAI model LC-908-G30 recycling preparative HPLC equipped with JAIGEL-1H and 2H with chloroform as an eluent.

Unless otherwise noted, all reactions were carried out under a dry argon atmosphere. Solvents were dried by the general methods and degassed before use. Azobenzene (**1a**), 3,3'-dimethylazobenzene (**1b**), dimethyl azobenzene-4,4'-dicarboxylate (**1l**), and di-*tert*-butyl azodicarboxylate (**1m**) were purchased from commercial sources. Other azobenzenes (**1**)<sup>S1</sup> and phosphalkynes (**2**)<sup>S2</sup> were prepared according to the literature procedures. The other reagents were commercially available.

## 2. Vanadium-Catalyzed [2+2+1] Cycloaddition Reactions of Azobenzenes (1) with Phosphaalkynes (2)

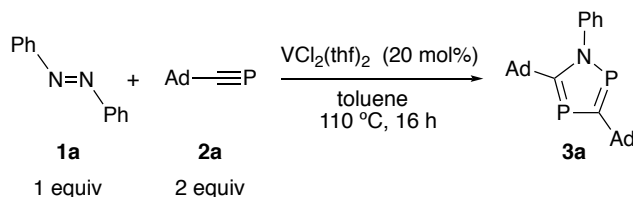

A typical experimental procedure of the preparation of 1,2,4-azadiphosphole **3a** is described below. In a 50 mL sealed vessel were placed azobenzene **1a** (17.8 mg, 0.0978 mmol),  $\text{VCl}_2(\text{thf})_2$  (5.5 mg, 0.021 mmol), and toluene (2.0 mL) under  $\text{N}_2$ . Then, 1-adamantylphosphaethyne **2a** (36.6 mg, 0.206 mmol) was added. The reaction resulting mixture was stirred at  $110\text{ }^\circ\text{C}$  for 16 h. After cooling to room temperature, toluene was removed under reduced pressure. The reaction mixture was purified by column chromatography on  $\text{SiO}_2$  with hexane as an eluent to afford **3a** (27.0 mg, 0.0604 mmol).

Isolated yields and spectroscopic data of 1,2,4-azadiphospholes (**3**) are described as follows:

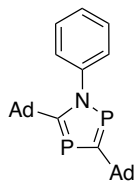

### **3a**

60% Yield. A pale yellow solid, m.p. =  $236.4\text{--}238.3\text{ }^\circ\text{C}$ .  $^1\text{H}$  NMR ( $\text{C}_6\text{D}_6$ ):  $\delta$  7.24–7.22 (m, 2H), 6.95–6.87 (m, 3H), 2.410–2.405 (m, 6H), 2.154–2.148 (m, 6H), 1.99 (brs, 3H), 1.80 (brs, 3H), 1.72–1.64 (m, 6H), 1.50–1.43 (m, 6H).  $^{13}\text{C}\{^1\text{H}\}$  NMR ( $\text{C}_6\text{D}_6$ ):  $\delta$  205.9 (dd,  $^1J_{\text{P-C}} = 62.9\text{ Hz}$  and  $^1J_{\text{P-C}} = 57.2\text{ Hz}$ ), 196.9 (d,  $^1J_{\text{P-C}} = 60.0\text{ Hz}$ ), 144.0 (d,  $^2J_{\text{P-C}} = 15.3\text{ Hz}$ ), 129.8 (d,  $^3J_{\text{P-C}} = 5.8\text{ Hz}$ ), 127.9, 48.5 (dd,  $^3J_{\text{P-C}} = 11.5\text{ Hz}$  and  $^4J_{\text{P-C}} = 8.6\text{ Hz}$ ), 44.4 (d,  $^3J_{\text{P-C}} = 14.3\text{ Hz}$ ), 43.1 (dd,  $^2J_{\text{P-C}} = 15.8\text{ Hz}$  and  $^3J_{\text{P-C}} = 3.4\text{ Hz}$ ), 39.9 (t,  $^2J_{\text{P-C}} = 16.2\text{ Hz}$ ), 36.9, 36.6, 29.8, 29.2 (d,  $^4J_{\text{P-C}} = 1.9\text{ Hz}$ ).  $^{31}\text{P}\{^1\text{H}\}$  NMR ( $\text{CDCl}_3$ ):  $\delta$  261.4 (d,  $^2J_{\text{P-P}} = 26.2\text{ Hz}$ ), 150.9 (d,  $^2J_{\text{P-P}} = 26.2\text{ Hz}$ ). HRMS (FAB) Calcd. for  $\text{C}_{28}\text{H}_{36}\text{NP}_2$   $[\text{M}+\text{H}]^+$ : 448.2323. Found: 448.2346.

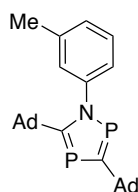

### 3b

55% Yield. A pale yellow solid, m.p. = 207.2-208.9 °C.  $^1\text{H}$  NMR ( $\text{CDCl}_3$ ):  $\delta$  7.27-7.20 (m, 4H), 2.39 (s, 3H), 2.10-2.08 (m, 9H), 2.04-1.97 (m, 6H), 1.90 (brs, 3H), 1.76 (brs, 6H), 1.61-1.48 (m, 6H).  $^{13}\text{C}\{^1\text{H}\}$  NMR ( $\text{CDCl}_3$ ):  $\delta$  205.5 (dd,  $^1J_{\text{P-C}} = 62.0$  Hz and  $^1J_{\text{P-C}} = 57.1$  Hz), 197.0 (d,  $^1J_{\text{P-C}} = 59.1$  Hz), 143.4 (d,  $^2J_{\text{P-C}} = 16.2$  Hz), 137.9, 130.1 (d,  $^3J_{\text{P-C}} = 5.7$  Hz), 129.2, 127.7, 126.5 (d,  $^3J_{\text{P-C}} = 5.7$  Hz), 48.0 (dd,  $^3J_{\text{P-C}} = 11.5$  Hz and  $^4J_{\text{P-C}} = 8.6$  Hz), 44.0 (d,  $^3J_{\text{P-C}} = 14.3$  Hz), 42.9 (dd,  $^2J_{\text{P-C}} = 16.2$  Hz and  $^3J_{\text{P-C}} = 2.9$  Hz), 39.4 (t,  $^2J_{\text{P-C}} = 15.8$  Hz), 36.7, 36.4, 29.5 28.9 (d,  $^4J_{\text{P-C}} = 1.9$  Hz), 21.4.  $^{31}\text{P}\{^1\text{H}\}$  NMR ( $\text{CDCl}_3$ ):  $\delta$  260.9 (d,  $^2J_{\text{P-P}} = 28.3$  Hz), 150.6 (d,  $^2J_{\text{P-P}} = 28.3$  Hz). HRMS (FAB) Calcd. for  $\text{C}_{29}\text{H}_{38}\text{NP}_2$   $[\text{M}+\text{H}]^+$ : 462.2479. Found: 462.2492.

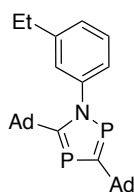

### 3c

51% Yield. A pale yellow solid, m.p. = 177.8-179.5 °C.  $^1\text{H}$  NMR ( $\text{CDCl}_3$ ):  $\delta$  7.30-7.20 (m, 4H), 2.68 (q,  $J = 7.7$  Hz, 2H), 2.11-2.08 (m, 9H), 2.03-1.97 (m, 6H), 1.89 (brs, 3H), 1.77 (brs, 6H), 1.60-1.47 (m, 6H), 1.24 (t,  $J = 7.7$  Hz, 3H).  $^{13}\text{C}\{^1\text{H}\}$  NMR ( $\text{CDCl}_3$ ):  $\delta$  205.5 (dd,  $^1J_{\text{P-C}} = 62.2$  Hz and  $^1J_{\text{P-C}} = 57.5$  Hz), 197.1 (d,  $^1J_{\text{P-C}} = 59.4$  Hz), 144.3, 143.4 (d,  $^2J_{\text{P-C}} = 16.3$  Hz), 129.1 (d,  $^3J_{\text{P-C}} = 4.8$  Hz), 128.1, 127.8, 126.7 (d,  $^3J_{\text{P-C}} = 4.8$  Hz), 48.0 (dd,  $^3J_{\text{P-C}} = 11.5$  Hz and  $^4J_{\text{P-C}} = 8.6$  Hz), 44.0 (d,  $^3J_{\text{P-C}} = 14.4$  Hz), 42.9 (dd,  $^2J_{\text{P-C}} = 16.3$  Hz and  $^3J_{\text{P-C}} = 2.9$  Hz), 39.5 (t,  $^2J_{\text{P-C}} = 15.8$  Hz), 36.8, 36.4, 29.5, 29.0 (d,  $^4J = 1.9$  Hz), 28.7.  $^{31}\text{P}\{^1\text{H}\}$  NMR ( $\text{CDCl}_3$ ):  $\delta$  260.5 (d,  $^2J_{\text{P-P}} = 28.2$  Hz), 150.5 (d,  $^2J_{\text{P-P}} = 28.2$  Hz). HRMS (FAB) Calcd. for  $\text{C}_{30}\text{H}_{39}\text{NP}_2$   $[\text{M}]^+$ : 475.2558. Found: 475.2567.

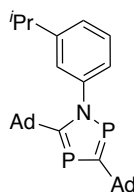

### 3d

46% Yield. A pale yellow solid, m.p. = 160.1-161.5 °C.  $^1\text{H}$  NMR ( $\text{CDCl}_3$ ):  $\delta$  7.30-7.19 (m, 4H), 2.99-2.89 (m, 1H), 2.11-2.08 (m, 9H), 2.03-1.95 (m, 6H), 1.88 (brs, 3H), 1.77 (brs, 6H),

1.60-1.47 (m, 6H), 1.27 (d,  $J = 4.4$  Hz, 3H), 1.25 (d,  $J = 4.0$  Hz, 3H).  $^{13}\text{C}\{^1\text{H}\}$  NMR ( $\text{CDCl}_3$ ):  $\delta$  205.5 (dd,  $^1J_{\text{P-C}} = 62.5$  Hz and  $^1J_{\text{P-C}} = 57.7$  Hz), 197.1 (d,  $^1J_{\text{P-C}} = 60.1$  Hz), 148.9, 143.4 (d,  $^2J_{\text{P-C}} = 15.3$  Hz), 127.8, 127.7 (d,  $^3J_{\text{P-C}} = 5.7$  Hz), 126.8 (d,  $^2J_{\text{P-C}} = 4.7$  Hz), 126.7, 48.0 (dd,  $^3J_{\text{P-C}} = 11.4$  Hz and  $^4J_{\text{P-C}} = 8.6$  Hz), 44.0 (d,  $^3J_{\text{P-C}} = 14.3$  Hz), 42.9 (dd,  $^2J_{\text{P-C}} = 16.2$  Hz and  $^3J_{\text{P-C}} = 2.9$  Hz), 39.5 (t,  $^2J_{\text{P-C}} = 15.8$  Hz), 36.8, 36.4, 34.0, 29.5, 29.0 (d,  $^4J_{\text{P-C}} = 1.9$  Hz), 24.2, 23.8.  $^{31}\text{P}\{^1\text{H}\}$  NMR ( $\text{CDCl}_3$ ):  $\delta$  260.1 (d,  $^2J_{\text{P-P}} = 28.4$  Hz), 150.5 (d,  $^2J_{\text{P-P}} = 28.4$  Hz). HRMS (FAB) Calcd. for  $\text{C}_{31}\text{H}_{41}\text{NP}_2$   $[\text{M}]^+$ : 489.2714. Found: 489.2722.

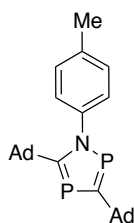

### 3e

55% Yield. A pale yellow solid, m.p. = 181.5-183.2 °C.  $^1\text{H}$  NMR ( $\text{CDCl}_3$ ):  $\delta$  7.27 (d,  $J = 8.4$  Hz, 2H), 7.16 (d,  $J = 8.4$  Hz, 2H), 2.42 (s, 3H), 2.10-2.08(m, 9H), 2.014-2.009 (m, 6H), 1.90 (brs, 3H), 1.77-1.76 (m, 6H), 1.60-1.48 (m, 6H).  $^{13}\text{C}\{^1\text{H}\}$  NMR ( $\text{CDCl}_3$ ):  $\delta$  205.5 (dd,  $^1J_{\text{P-C}} = 61.0$  Hz and  $^1J_{\text{P-C}} = 57.2$  Hz), 197.1 (d,  $^1J_{\text{P-C}} = 60.0$  Hz), 140.8 (d,  $^2J_{\text{P-C}} = 16.3$  Hz), 138.4, 129.3 (d,  $^3J_{\text{P-C}} = 4.8$  Hz), 128.6, 48.0 (dd,  $^3J_{\text{P-C}} = 11.5$  Hz and  $^4J_{\text{P-C}} = 8.6$  Hz), 43.9 (d,  $^3J_{\text{P-C}} = 15.3$  Hz), 42.8 (dd,  $^2J_{\text{P-C}} = 15.3$  Hz and  $^3J_{\text{P-C}} = 2.9$  Hz), 39.4 (t,  $^2J_{\text{P-C}} = 15.7$  Hz), 36.8, 36.4, 29.5, 28.9 (d,  $^4J_{\text{P-C}} = 1.9$  Hz), 21.4.  $^{31}\text{P}\{^1\text{H}\}$  NMR ( $\text{CDCl}_3$ ):  $\delta$  261.4 (d,  $^2J_{\text{P-P}} = 30.4$  Hz), 150.6 (d,  $^2J_{\text{P-P}} = 30.4$  Hz). HRMS (FAB) Calcd. for  $\text{C}_{29}\text{H}_{37}\text{NP}_2$   $[\text{M}]^+$ : 461.2401. Found: 461.2387.

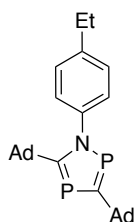

### 3f

53% Yield. A pale yellow solid, m.p. = 175.5-177.1 °C.  $^1\text{H}$  NMR ( $\text{C}_6\text{D}_6$ ):  $\delta$  7.21 (d,  $J = 8.0$  Hz, 2H), 6.78 (d,  $J = 8.0$  Hz, 2H), 2.423-2.419 (m, 6H), 2.31 (q,  $J = 7.6$  Hz, 2H), 2.205-2.198 (m, 6H), 2.00 (brs, 3H), 1.82 (brs, 3H), 1.73-1.64 (m, 6H), 1.48 (brs, 6H), 0.96 (t,  $J = 7.6$  Hz, 2H).  $^{13}\text{C}\{^1\text{H}\}$  NMR ( $\text{C}_6\text{D}_6$ ):  $\delta$  205.9 (dd,  $^1J_{\text{P-C}} = 62.4$  Hz and  $^1J_{\text{P-C}} = 56.7$  Hz), 196.9 (d,  $^1J_{\text{P-C}} = 59.6$  Hz), 144.5, 141.6 (d,  $^2J_{\text{P-C}} = 16.2$  Hz), 129.7 (d,  $^3J_{\text{P-C}} = 4.8$  Hz), 127.4, 48.5 (dd,  $^3J_{\text{P-C}} = 11.5$  Hz and  $^4J_{\text{P-C}} = 8.6$  Hz), 44.4 (d,  $^3J_{\text{P-C}} = 15.2$  Hz), 43.0 (dd,  $^2J_{\text{P-C}} = 15.7$  Hz and  $^3J_{\text{P-C}} = 3.3$  Hz),

39.9 (t,  $^2J_{P-C} = 15.8$  Hz), 36.9, 36.6, 29.8, 29.3 (d,  $^4J_{P-C} = 1.9$  Hz), 28.6, 15.4.  $^{31}P\{^1H\}$  NMR (CDCl<sub>3</sub>):  $\delta$  261.2 (d,  $^2J_{P-P} = 28.4$  Hz), 150.4 (d,  $^2J_{P-P} = 28.4$  Hz). HRMS (FAB) Calcd. for C<sub>30</sub>H<sub>39</sub>NP<sub>2</sub> [M]<sup>+</sup>: 475.2558. Found: 475.2562.

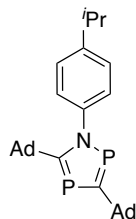

### 3g

54% Yield. A pale yellow solid, m.p. = 160.9-162.6 °C.  $^1H$  NMR (CDCl<sub>3</sub>):  $\delta$  7.31 (d,  $J = 8.4$  Hz, 2H), 7.22 (d,  $J = 8.4$  Hz, 2H), 3.03-2.93 (m, 1H), 2.10-2.08 (m, 9H), 2.00 (s, 6H) 1.89 (brs, 3H), 1.77 (s, 6H), 1.60-1.46 (m, 6H), 1.29 (d,  $J = 6.8$  Hz, 6H).  $^{13}C\{^1H\}$  NMR (CDCl<sub>3</sub>):  $\delta$  205.5 (dd,  $^1J_{P-C} = 62.0$  Hz and  $^1J_{P-C} = 57.2$  Hz), 197.1 (d,  $^2J_{P-C} = 59.2$  Hz), 149.5, 140.9 (d,  $^2J_{P-C} = 16.2$  Hz), 129.3 (d,  $^3J_{P-C} = 5.7$  Hz), 125.8, 48.0 (dd,  $^3J_{P-C} = 11.4$  Hz and  $^4J_{P-C} = 8.6$  Hz), 43.9 (d,  $^3J_{P-C} = 15.3$  Hz), 42.8 (dd,  $^2J_{P-C} = 15.8$  Hz and  $^3J_{P-C} = 3.4$  Hz), 39.4 (t,  $^2J_{P-C} = 15.3$  Hz), 36.8, 36.4, 34.0, 29.5, 28.9 (d,  $^4J_{P-C} = 1.9$  Hz), 24.2.  $^{31}P\{^1H\}$  NMR (CDCl<sub>3</sub>):  $\delta$  260.9 (d,  $^2J_{P-P} = 26.2$  Hz), 150.3 (d,  $^2J_{P-P} = 26.2$  Hz). HRMS (FAB) Calcd. for C<sub>31</sub>H<sub>41</sub>NP<sub>2</sub> [M]<sup>+</sup>: 489.2714. Found: 489.2725.

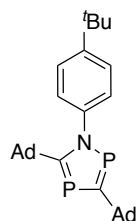

### 3h

66% Yield. A pale yellow solid, m.p. = 204.5-206.1 °C.  $^1H$  NMR (C<sub>6</sub>D<sub>6</sub>):  $\delta$  7.28-7.26 (m, 2H), 7.05-7.03 (m, 2H), 2.43-2.42 (m, 6H), 2.210-2.205 (m, 6H), 1.99 (brs, 3H), 1.82 (brs, 3H), 1.72-1.64 (m, 6H), 1.49 (brs, 6H) 1.10 (s, 9H).  $^{13}C\{^1H\}$  NMR (C<sub>6</sub>D<sub>6</sub>):  $\delta$  205.9 (dd,  $^1J_{P-C} = 62.9$  Hz and  $^1J_{P-C} = 57.2$  Hz), 197.0 (d,  $^1J_{P-C} = 61.1$  Hz), 151.6, 141.4 (d,  $^2J_{P-C} = 17.2$  Hz), 129.5 (d,  $^3J_{P-C} = 4.7$  Hz), 124.9, 48.5 (dd,  $^3J_{P-C} = 11.0$  Hz and  $^4J_{P-C} = 8.2$  Hz), 44.3 (d,  $^3J_{P-C} = 14.3$  Hz), 43.0 (dd,  $^2J_{P-C} = 16.2$  Hz and  $^3J_{P-C} = 2.9$  Hz), 39.9 (t,  $^2J_{P-C} = 15.7$  Hz), 36.9, 36.7, 34.6, 31.3, 29.8, 29.3 (d,  $^4J_{P-C} = 1.9$  Hz).  $^{31}P\{^1H\}$  NMR (CDCl<sub>3</sub>):  $\delta$  260.9 (d,  $^2J_{P-P} = 30.5$  Hz), 150.3 (d,  $^2J_{P-P} = 30.5$  Hz). HRMS (FAB) Calcd. for C<sub>32</sub>H<sub>43</sub>NP<sub>2</sub> [M]<sup>+</sup>: 503.2871. Found:

503.2863.

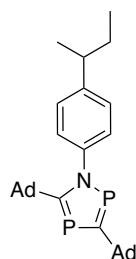

### 3i

50% Yield. A pale yellow solid, m.p. = 109.6-111.3 °C.  $^1\text{H}$  NMR ( $\text{CDCl}_3$ ):  $\delta$  7.33-7.29 (m, 2H), 7.19-7.15 (m, 2H), 2.72-2.63 (m, 1H), 2.10-2.08 (m, 9H), 2.00-1.99 (m, 6H), 1.89 (brs, 3H), 1.77-1.76 (m, 6H), 1.69-1.46 (m, 8H), 1.28 (d,  $J = 7.2$  Hz, 3H), 0.81 (t,  $J = 7.4$  Hz, 3H).  $^{13}\text{C}\{^1\text{H}\}$  NMR ( $\text{CDCl}_3$ ):  $\delta$  205.5 (dd,  $^1J_{\text{P-C}} = 62.3$  Hz and  $^1J_{\text{P-C}} = 56.5$  Hz), 197.1 (d,  $^1J_{\text{P-C}} = 59.4$  Hz), 148.1, 141.0 (d,  $^2J_{\text{P-C}} = 16.3$  Hz), 129.4 (d,  $^3J_{\text{P-C}} = 4.8$  Hz), 129.2 (d,  $^3J_{\text{P-C}} = 4.8$  Hz), 127.0, 126.0, 48.0 (dd,  $^3J_{\text{P-C}} = 11.5$  Hz and  $^4J_{\text{P-C}} = 8.6$  Hz), 43.9 (d,  $^3J_{\text{P-C}} = 14.4$  Hz), 42.8 (dd,  $^2J_{\text{P-C}} = 16.3$  Hz and  $^3J_{\text{P-C}} = 2.9$  Hz), 41.5, 39.5 (t,  $^3J_{\text{P-C}} = 15.3$  Hz), 36.8, 36.4, 31.4, 29.5, 28.9 (d,  $^4J_{\text{P-C}} = 1.9$  Hz), 22.1, 12.2.  $^{31}\text{P}\{^1\text{H}\}$  NMR ( $\text{CDCl}_3$ ):  $\delta$  260.4 (d,  $^2J_{\text{P-P}} = 28.1$  Hz), 150.2 (d,  $^2J_{\text{P-P}} = 28.1$  Hz). HRMS (FAB) Calcd. for  $\text{C}_{32}\text{H}_{44}\text{NP}_2$  [ $\text{M}+\text{H}$ ] $^+$ : 504.2949. Found: 504.2928.

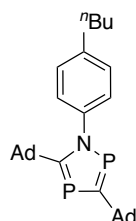

### 3j

47% Yield. A pale yellow solid, m.p. = 198.2-199.6 °C.  $^1\text{H}$  NMR ( $\text{CDCl}_3$ ):  $\delta$  7.29 (d,  $J = 8.0$  Hz, 2H), 7.17 (d,  $J = 8.0$  Hz, 2H), 2.68 (t,  $J = 7.4$  Hz, 2H), 2.10-2.08 (m, 9H), 2.002-1.996 (m, 6H), 1.89 (m, 3H), 1.76 (m, 6H), 1.76-1.47 (m, 8H), 1.41-1.31 (m, 2H), 0.94 (t,  $J = 7.2$  Hz, 3H).  $^{13}\text{C}\{^1\text{H}\}$  NMR ( $\text{CDCl}_3$ ):  $\delta$  205.5 (dd,  $^1J_{\text{P-C}} = 62.3$  Hz and  $^1J_{\text{P-C}} = 57.5$  Hz), 197.1 (d,  $^1J_{\text{P-C}} = 59.4$  Hz), 143.4, 140.9 (d,  $^2J_{\text{P-C}} = 15.3$  Hz), 129.3 (d,  $^3J_{\text{P-C}} = 4.8$  Hz), 127.9, 48.0 (dd,  $^3J_{\text{P-C}} = 11.5$  Hz and  $^4J_{\text{P-C}} = 8.7$  Hz), 43.9 (d,  $^3J_{\text{P-C}} = 14.3$  Hz), 42.8 (dd,  $^2J_{\text{P-C}} = 16.3$  Hz and  $^3J_{\text{P-C}} = 2.9$  Hz), 39.4 (t,  $^2J_{\text{P-C}} = 15.4$  Hz), 36.8, 36.4, 35.4, 33.6, 29.5, 29.4 (d,  $^4J_{\text{P-C}} = 1.9$  Hz), 22.3, 14.1.  $^{31}\text{P}\{^1\text{H}\}$  NMR ( $\text{CDCl}_3$ ):  $\delta$  260.8 (d,  $^2J_{\text{P-P}} = 30.5$  Hz), 150.4 (d,  $^2J_{\text{P-P}} = 30.5$  Hz). HRMS (FAB) Calcd. for  $\text{C}_{32}\text{H}_{43}\text{NP}_2$  [ $\text{M}$ ] $^+$ : 503.2871. Found: 503.2847.

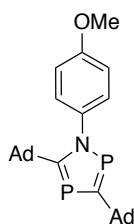

### 3k

52% Yield. A pale yellow solid, m.p. = 210.5-212.1 °C.  $^1\text{H}$  NMR ( $\text{C}_6\text{D}_6$ ):  $\delta$  7.16-7.15 (m, 2H), 6.52-6.48 (m, 2H), 3.15 (s, 3H), 2.43-2.42 (m, 6H), 2.208-2.201 (m, 6H), 2.00 (brs, 3H), 1.84 (brs, 3H), 1.73-1.64 (m, 6H), 1.49 (brs, 6H).  $^{13}\text{C}\{^1\text{H}\}$  NMR ( $\text{C}_6\text{D}_6$ ):  $\delta$  205.9 (dd,  $^1J_{\text{P-C}} = 62.9$  Hz and  $^1J_{\text{P-C}} = 57.2$  Hz), 197.1 (d,  $^1J_{\text{P-C}} = 60.0$  Hz), 159.7, 136.5 (d,  $^2J_{\text{P-C}} = 16.2$  Hz), 130.8 (d,  $^3J_{\text{P-C}} = 4.7$  Hz), 113.1, 54.9, 48.5 (dd,  $^3J_{\text{P-C}} = 11.5$  Hz and  $^4J_{\text{P-C}} = 8.6$  Hz), 44.4 (d,  $^3J_{\text{P-C}} = 14.3$  Hz), 43.0 (dd,  $^2J_{\text{P-C}} = 16.2$  Hz and  $^3J_{\text{P-C}} = 2.9$  Hz), 39.9 (t,  $^2J_{\text{P-C}} = 15.8$  Hz), 36.9, 36.6, 29.8, 29.3 (d,  $^4J_{\text{P-C}} = 1.9$  Hz).  $^{31}\text{P}\{^1\text{H}\}$  NMR ( $\text{CDCl}_3$ ):  $\delta$  261.4 (d,  $^2J_{\text{P-P}} = 28.1$  Hz), 150.8 (d,  $^2J_{\text{P-P}} = 28.1$  Hz). HRMS (FAB) Calcd. for  $\text{C}_{29}\text{H}_{37}\text{NOP}_2$   $[\text{M}]^+$ : 477.2350. Found: 477.2369.

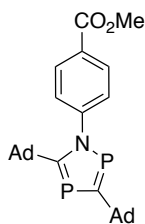

### 3l

47% Yield. A yellow solid. m.p. 146.5-148.3 °C.  $^1\text{H}$  NMR ( $\text{CDCl}_3$ ):  $\delta$  8.07 (d,  $J = 8.4$  Hz, 2H), 7.49 (d,  $J = 8.4$  Hz, 2H), 3.96 (s, 3H), 2.09 (brs, 9H), 1.991-1.985 (m, 6H), 1.89 (brs, 3H), 1.77 (brs, 6H), 1.60-1.46 (m, 6H).  $^{13}\text{C}\{^1\text{H}\}$  NMR ( $\text{CDCl}_3$ ):  $\delta$  205.9 (dd,  $^1J_{\text{P-C}} = 62.8$  Hz and  $^1J_{\text{P-C}} = 57.1$  Hz), 197.2 (d,  $^1J_{\text{P-C}} = 59.5$  Hz), 166.4, 148.0 (d,  $^2J_{\text{P-C}} = 16.3$  Hz), 130.2, 129.7 (d,  $^3J_{\text{P-C}} = 4.8$  Hz), 129.4, 52.5, 48.0 (dd,  $^3J_{\text{P-C}} = 11.5$  Hz and  $^4J_{\text{P-C}} = 8.6$  Hz), 44.2 (d,  $^3J_{\text{P-C}} = 14.4$  Hz), 42.9 (dd,  $^2J_{\text{P-C}} = 15.4$  Hz and  $^3J_{\text{P-C}} = 2.9$  Hz), 39.5 (t,  $^2J_{\text{P-C}} = 15.4$  Hz), 36.7, 36.3, 29.5, 28.9 (d,  $^4J_{\text{P-C}} = 2.9$  Hz).  $^{31}\text{P}\{^1\text{H}\}$  NMR ( $\text{CDCl}_3$ ):  $\delta$  261.8 (d,  $^2J_{\text{P-P}} = 30.3$  Hz), 152.9 (d,  $^2J_{\text{P-P}} = 30.3$  Hz). HRMS (FAB) Calcd. for  $\text{C}_{30}\text{H}_{38}\text{NO}_2\text{P}_2$   $[\text{M}+\text{H}]^+$ : 506.2378. Found: 506.2397.



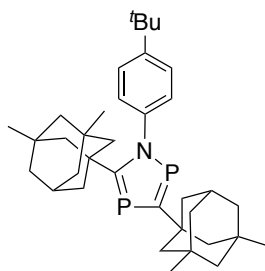

### 3o

50% Yield. A pale yellow solid, m.p. = 161.8-163.6 °C.  $^1\text{H}$  NMR ( $\text{CDCl}_3$ ):  $\delta$  7.39-7.37 (m, 2H), 7.31-7.29 (m, 2H), 2.18-1.51 (m, 14H), 1.45-1.33 (m, 13H), 1.31-0.89 (m, 8H), 0.86 (s, 6H), 0.70 (s, 6H).  $^{13}\text{C}\{^1\text{H}\}$  NMR ( $\text{CDCl}_3$ ):  $\delta$  204.7 (dd,  $^1J_{\text{P-C}} = 61.8$  Hz and  $^1J_{\text{P-C}} = 57.0$  Hz), 196.7 (d,  $^1J_{\text{P-C}} = 58.4$  Hz), 152.0, 140.6 (d,  $^2J_{\text{P-C}} = 16.3$  Hz), 129.0 (d,  $^3J_{\text{P-C}} = 4.8$  Hz), 124.7, 54.3 (dd,  $^3J_{\text{P-C}} = 10.6$  Hz and  $^4J_{\text{P-C}} = 8.6$  Hz), 50.9, 50.4, 50.1 (d,  $^3J_{\text{P-C}} = 14.4$  Hz), 46.4 (dd,  $^3J_{\text{P-C}} = 11.5$  Hz and  $^4J_{\text{P-C}} = 7.7$  Hz), 44.6 (dd,  $^2J_{\text{P-C}} = 15.4$  Hz and  $^3J_{\text{P-C}} = 2.9$  Hz), 43.0, 42.6, 42.6-42.5 (m), 41.0 (t,  $^2J_{\text{P-C}} = 15.4$  Hz), 34.9, 32.2, 31.5, 30.8, 30.6, 30.0.  $^{31}\text{P}\{^1\text{H}\}$  NMR ( $\text{CDCl}_3$ ):  $\delta$  259.5 (d,  $^2J_{\text{P-P}} = 30.3$  Hz), 149.6 (d,  $^2J_{\text{P-P}} = 30.3$  Hz). HRMS (FAB) Calcd. for  $\text{C}_{36}\text{H}_{51}\text{NP}_2$   $[\text{M}]^+$ : 559.3497. Found: 559.3509.

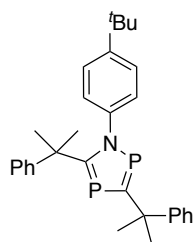

### 3p

41% Yield. A pale yellow solid, m.p. = 108.0-109.8 °C.  $^1\text{H}$  NMR ( $\text{C}_6\text{D}_6$ ):  $\delta$  7.68-7.66 (m, 2H), 7.25-7.19 (m, 2H), 7.10-7.06 (m, 1H), 6.90-6.82 (m, 5H), 6.71-6.69 (m, 2H), 6.52-6.50 (m, 2H), 2.06 (s, 6H), 1.69 (d,  $^4J_{\text{P-H}} = 2.0$  Hz, 6H), 1.07 (s, 9H).  $^{13}\text{C}\{^1\text{H}\}$  NMR ( $\text{C}_6\text{D}_6$ ):  $\delta$  204.9 (dd,  $^1J_{\text{P-C}} = 63.0$  Hz and  $^1J_{\text{P-C}} = 57.2$  Hz), 195.1 (d,  $^1J_{\text{P-C}} = 61.0$  Hz), 150.8 (dd,  $^3J_{\text{P-C}} = 5.8$  Hz and  $^3J_{\text{P-C}} = 2.9$  Hz), 150.4, 148.5 (d,  $^3J_{\text{P-C}} = 1.9$  Hz), 139.3 (d,  $^2J_{\text{P-C}} = 15.3$  Hz), 129.0 (d,  $^3J_{\text{P-C}} = 4.8$  Hz), 128.5, 128.2, 127.0, 126.6, 126.4, 125.8, 124.3, 45.8 (dd,  $^2J_{\text{P-C}} = 17.4$  Hz and  $^3J_{\text{P-C}} = 2.9$  Hz), 43.9 (t,  $^2J_{\text{P-C}} = 17.2$  Hz), 34.8 (t,  $^3J_{\text{P-C}} = 9.1$  Hz), 34.3, 33.5 (d,  $^3J_{\text{P-C}} = 17.2$  Hz), 31.3.  $^{31}\text{P}\{^1\text{H}\}$  NMR ( $\text{CDCl}_3$ ):  $\delta$  259.9 (d,  $^2J_{\text{P-P}} = 30.4$  Hz), 154.8 (d,  $^2J_{\text{P-P}} = 30.4$  Hz). HRMS (FAB) Calcd. for  $\text{C}_{30}\text{H}_{35}\text{NP}_2$   $[\text{M}]^+$ : 471.2245. Found: 471.2246.

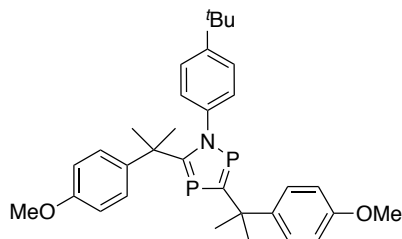

### 3q

45% Yield. A pale yellow solid, m.p. = 108.0-109.8 °C.  $^1\text{H}$  NMR ( $\text{CDCl}_3$ ):  $\delta$  7.51-7.47 (m, 2H), 6.94-6.92 (m, 2H), 6.87-6.84 (m, 2H), 6.79-6.77 (m, 2H), 6.62-6.60 (m, 2H), 6.52-6.50 (m, 2H), 3.79 (s, 3H), 3.76 (s, 3H), 1.93 (s, 6H), 1.66 (d,  $^4J_{\text{P-H}} = 2.0$  Hz, 6H), 1.25 (s, 9H).  $^{13}\text{C}\{^1\text{H}\}$  NMR ( $\text{CDCl}_3$ ):  $\delta$  204.7 (dd,  $^1J_{\text{P-C}} = 63.0$  Hz and  $^1J_{\text{P-C}} = 56.5$  Hz), 195.1 (d,  $^2J_{\text{P-C}} = 61.0$  Hz), 157.8, 157.7, 150.5, 142.8 (dd,  $^3J_{\text{P-C}} = 5.8$  Hz and  $^3J_{\text{P-C}} = 2.9$  Hz), 140.4 (d,  $^3J_{\text{P-C}} = 2.8$  Hz), 138.8 (d,  $^2J_{\text{P-C}} = 16.2$  Hz), 128.5 (d,  $^3J_{\text{P-C}} = 4.8$  Hz), 127.7, 127.4, 124.0, 113.32, 113.30, 55.4, 55.3, 45.1 (dd,  $^2J_{\text{P-C}} = 17.2$  Hz and  $^3J_{\text{P-C}} = 2.9$  Hz), 42.9 (t,  $^2J_{\text{P-C}} = 17.7$  Hz), 34.8 (t,  $^3J_{\text{P-C}} = 9.1$  Hz), 34.6, 33.4 (d,  $^3J_{\text{P-C}} = 17.1$  Hz), 31.4.  $^{31}\text{P}\{^1\text{H}\}$  NMR ( $\text{CDCl}_3$ ):  $\delta$  259.1 (d,  $^2J_{\text{P-P}} = 30.5$  Hz), 153.7 (d,  $^2J_{\text{P-P}} = 30.5$  Hz). HRMS (FAB) Calcd. for  $\text{C}_{32}\text{H}_{39}\text{NO}_2\text{P}_2$   $[\text{M}]^+$ : 531.2456. Found: 531.2480.

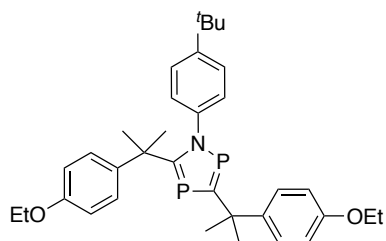

### 3r

36% Yield. A pale yellow solid, m.p. = 110.1-111.5 °C.  $^1\text{H}$  NMR ( $\text{CDCl}_3$ ):  $\delta$  7.49-7.46 (m, 2H), 6.95-6.92 (m, 2H), 6.85-6.83 (m, 2H), 6.78-6.75 (m, 2H), 6.62-6.58 (m, 2H), 6.52-6.50 (m, 2H), 4.03-3.95 (m, 4H), 1.92 (s, 6H), 1.65 (d,  $^4J_{\text{P-H}} = 2.0$  Hz, 6H), 1.43-1.37 (m, 6H), 1.25 (s, 9H).  $^{13}\text{C}\{^1\text{H}\}$  NMR ( $\text{CDCl}_3$ ):  $\delta$  204.8 (dd,  $^1J_{\text{P-C}} = 63.4$  Hz and  $^1J_{\text{P-C}} = 56.5$  Hz), 195.1 (d,  $^1J_{\text{P-C}} = 59.4$  Hz), 157.2, 157.0, 150.5, 142.6 (dd,  $^3J_{\text{P-C}} = 6.3$  Hz and  $^3J_{\text{P-C}} = 2.4$  Hz), 140.3, 138.8 (d,  $^2J_{\text{P-C}} = 15.3$  Hz), 128.5 (d,  $^3J_{\text{P-C}} = 4.8$  Hz), 127.7, 127.4, 124.0, 114.0, 113.8, 63.5, 63.4, 45.1 (dd,  $^2J_{\text{P-C}} = 17.2$  Hz and  $^3J_{\text{P-C}} = 2.9$  Hz), 42.9 (t,  $^2J_{\text{P-C}} = 17.3$  Hz), 34.8 (t,  $^3J_{\text{P-C}} = 8.6$  Hz), 34.6, 33.4 (d,  $^3J_{\text{P-C}} = 17.3$  Hz), 31.4, 15.1, 15.0.  $^{31}\text{P}\{^1\text{H}\}$  NMR ( $\text{CDCl}_3$ ):  $\delta$  259.2 (d,  $^2J_{\text{P-P}} = 30.5$  Hz), 153.8 (d,  $^2J_{\text{P-P}} = 30.5$  Hz). HRMS (FAB) Calcd. for  $\text{C}_{34}\text{H}_{43}\text{NO}_2\text{P}_2$   $[\text{M}]^+$ : 559.2769. Found: 559.2759.

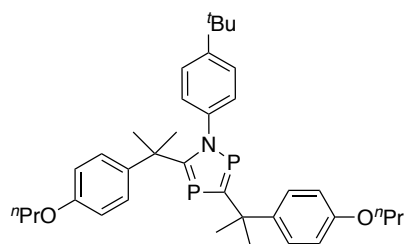

### 3s

31% Yield. A pale yellow solid, m.p. = 109.5-110.8 °C.  $^1\text{H}$  NMR ( $\text{CDCl}_3$ ):  $\delta$  7.48-7.45 (m, 2H), 6.94-6.92 (m, 2H), 6.86-6.82 (m, 2H), 6.77-6.74 (m, 2H), 6.62-6.58 (m, 2H), 6.52-6.50 (m, 2H), 3.91-3.85 (m, 4H), 1.92 (s, 6H), 1.85-1.74 (m, 4H), 1.65 (d,  $^4J_{\text{P-H}} = 1.6$  Hz, 6H), 1.25 (s, 9H), 1.06-1.00 (m, 6H).  $^{13}\text{C}\{^1\text{H}\}$  NMR ( $\text{CDCl}_3$ ):  $\delta$  204.8 (dd,  $^1J_{\text{P-C}} = 62.8$  Hz and  $^1J_{\text{P-C}} = 56.1$  Hz), 195.1 (d,  $^1J_{\text{P-C}} = 60.4$  Hz), 157.4, 157.2, 150.4, 142.6 (dd,  $^3J_{\text{P-C}} = 6.7$  Hz and  $^3J_{\text{P-C}} = 2.9$  Hz), 140.2 (d,  $^3J_{\text{P-C}} = 2.9$  Hz), 138.8 (d,  $^2J_{\text{P-C}} = 16.3$  Hz), 128.5 (d,  $^3J_{\text{P-C}} = 5.7$  Hz), 127.7, 127.4, 124.0, 114.0, 113.8, 69.7, 69.4, 45.1 (dd,  $^2J_{\text{P-C}} = 17.2$  Hz and  $^3J_{\text{P-C}} = 2.9$  Hz), 42.9 (t,  $^2J_{\text{P-C}} = 17.3$  Hz), 34.8 (t,  $^3J_{\text{P-C}} = 9.1$  Hz), 34.6, 33.4 (d,  $^3J_{\text{P-C}} = 17.2$  Hz), 31.4, 22.8, 22.7, 10.74, 10.70.  $^{31}\text{P}\{^1\text{H}\}$  NMR ( $\text{CDCl}_3$ ):  $\delta$  259.1 (d,  $^2J_{\text{P-P}} = 30.4$  Hz), 153.6 (d,  $^2J_{\text{P-P}} = 30.4$  Hz). HRMS (FAB) Calcd. for  $\text{C}_{36}\text{H}_{47}\text{NO}_2\text{P}_2$   $[\text{M}]^+$ : 578.3082. Found: 578.3069.

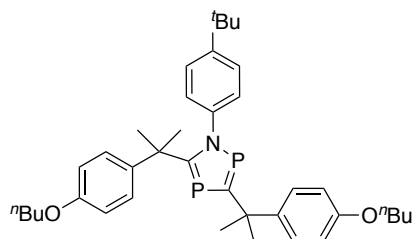

### 3t

27% Yield. A pale yellow solid, m.p. = 115.3-116.7 °C.  $^1\text{H}$  NMR ( $\text{CDCl}_3$ ):  $\delta$  7.48-7.46 (m, 2H), 6.94-6.92 (m, 2H), 6.85-6.83 (m, 2H), 6.77-6.75 (m, 2H), 6.61-6.59 (m, 2H), 6.52-6.50 (m, 2H), 3.95-3.89 (m, 4H), 1.92 (s, 6H), 1.80-1.71 (m, 4H), 1.65 (d,  $^4J_{\text{P-H}} = 1.6$  Hz, 6H), 1.54-1.43 (m, 4H), 1.25 (s, 9H), 1.00-0.94 (m, 6H).  $^{13}\text{C}\{^1\text{H}\}$  NMR ( $\text{CDCl}_3$ ):  $\delta$  204.8 (dd,  $^1J_{\text{P-C}} = 63.0$  Hz and  $^1J_{\text{P-C}} = 56.3$  Hz), 195.1 (d,  $^1J_{\text{P-C}} = 60.0$  Hz), 157.5, 157.3, 150.4, 142.6 (t,  $^3J_{\text{P-C}} = ^3J_{\text{P-C}} = 2.9$  Hz), 140.2, 138.8 (d,  $^2J_{\text{P-C}} = 15.2$  Hz), 128.5 (d,  $^3J_{\text{P-C}} = 4.8$  Hz), 127.7, 127.4, 124.0, 114.0, 113.8, 67.8, 67.6, 45.1 (dd,  $^2J_{\text{P-C}} = 17.2$  Hz and  $^3J_{\text{P-C}} = 2.9$  Hz), 42.9 (t,  $^2J_{\text{P-C}} = 17.7$  Hz), 34.9 (t,  $^3J_{\text{P-C}} = 9.1$  Hz), 34.6, 33.5, 33.3, 31.5 (d,  $^3J_{\text{P-C}} = 9.5$  Hz), 31.4, 19.44, 19.42, 14.0.  $^{31}\text{P}\{^1\text{H}\}$  NMR ( $\text{CDCl}_3$ ):  $\delta$  259.2 (d,  $^2J_{\text{P-P}} = 30.5$  Hz), 153.6 (d,  $^2J_{\text{P-P}} = 30.5$  Hz). HRMS (FAB)

Calcd. for C<sub>38</sub>H<sub>52</sub>NO<sub>2</sub>P<sub>2</sub> [M+H]<sup>+</sup>: 616.3473. Found: 616.3494.

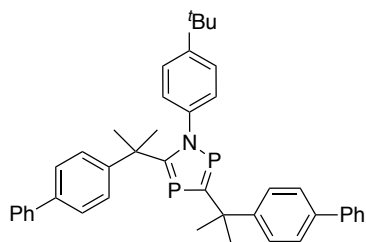

### 3u

41% yield. A yellow solid, m.p. = 154.6-156.1 °C. <sup>1</sup>H NMR (CDCl<sub>3</sub>): δ 7.67-7.55 (m, 9H), 7.46-7.39 (m, 5H), 7.36-7.29 (m, 4H), 6.96-6.89 (m, 3H), 6.57-6.55 (m, 1H), 2.00 (s, 6H), 1.74 (d, <sup>4</sup>J<sub>P-H</sub> = 2.0 Hz, 6H), 1.22 (s, 9H). <sup>13</sup>C {<sup>1</sup>H} NMR (CDCl<sub>3</sub>): δ 203.7 (dd, <sup>1</sup>J<sub>P-C</sub> = 63.5 Hz and <sup>1</sup>J<sub>P-C</sub> = 56.8 Hz), 194.9 (d, <sup>1</sup>J<sub>P-C</sub> = 60.0 Hz), 150.7, 149.7 (dd, <sup>3</sup>J<sub>P-C</sub> = 5.7 Hz and <sup>3</sup>J<sub>P-C</sub> = 1.9 Hz), 147.2 (d, <sup>3</sup>J<sub>P-C</sub> = 2.9 Hz), 141.0, 138.9, 138.7 (d, <sup>2</sup>J<sub>P-C</sub> = 16.2 Hz), 138.5, 128.9, 128.8, 128.6 (d, <sup>3</sup>J<sub>P-C</sub> = 5.7 Hz), 127.24, 127.17, 127.1, 127.0, 126.8, 126.6, 124.1, 45.5 (dd, <sup>2</sup>J<sub>P-C</sub> = 17.2 Hz and <sup>3</sup>J<sub>P-C</sub> = 2.9 Hz), 43.4 (t, <sup>2</sup>J<sub>P-C</sub> = 17.7 Hz), 34.7 (t, <sup>3</sup>J<sub>P-C</sub> = 9.5 Hz), 34.6, 33.3 (d, <sup>3</sup>J<sub>P-C</sub> = 17.1 Hz), 31.4. <sup>31</sup>P {<sup>1</sup>H} NMR (CDCl<sub>3</sub>): δ 260.2 (d, <sup>2</sup>J<sub>P-P</sub> = 30.5 Hz), 154.9 (d, <sup>2</sup>J<sub>P-P</sub> = 30.5 Hz). HRMS (FAB) Calcd. for C<sub>42</sub>H<sub>44</sub>NP<sub>2</sub> [M+H]<sup>+</sup>: 624.2949. Found: 624.2974.

### 3. X-ray crystallographic analysis of 3a

Crystals suitable for an X-ray analysis was obtained by the vapor-assisted recrystallization from Et<sub>2</sub>O (**3a**). Diffraction data were collected for the 2θ range of 5 to 55° at -95 °C on a Rigaku R-Axis RAPID imaging plate area detector with graphite monochromated Mo-Kα (λ = 0.71075 Å) radiation with VariMax optics. Intensity data were corrected for empirical absorptions (ABSCOR), and for Lorentz and polarization effects. Structure solutions and refinements were carried out by using CrystalStructure package.<sup>S3</sup> The positions of non-hydrogen atoms were determined by direct methods (SHELXS Version 2013/1)<sup>S4</sup> and subsequent Fourier synthesis (SHELXL Version 2016/6)<sup>S4</sup>, and were refined on F<sub>o</sub><sup>2</sup> using all the unique reflections by full-matrix least squares.

As the molecule is packed in an S<sub>1</sub> symmetry with a mirror plane consisting of a five-membered ring (P(1)-C(1)-P(2)-C(2)-N(1)), C(7)-C(8)-C(9) and C(13) in one of the two 1-adamantyl groups, and C(14) in the other 1-adamantyl group, the asymmetric unit

contains only a half of the molecule. Here, the latter 1-adamantyl group (C(14) to C(23)) is heavily disordered among two positions sharing C(14), positions of the nine carbon atoms (C(15) to C(23)) were solved with isotropic thermal parameters, where positions of 15 hydrogen atoms attached to the 1-adamantyl carbon atoms could not be located. In addition, the former 1-adamantyl group (C(7) to C(13)) is also slightly disordered, thus one shared carbon atom (C(13)) was solved isotropically. All the other non-hydrogen atoms were solved with anisotropic thermal parameters, while all the other hydrogen atoms were located at the calculated positions. Anomalous dispersion effects were included in  $F_c$ , and neutral atom scattering factors and the values for  $\Delta f'$  and  $\Delta f''$  were taken from ref. S5. Details of the crystal and data collection parameters are summarized in Table S1.

According to the checkCIF reports, there are three B-level alerts for crystallographic data of **3a**. The first B-level alert of **3a** (PLAT043\_ALERT\_1\_B Calculated and Reported Mol. Weight Differ by .. 15.15 Check) is due to a heavy disorder in one of the two 1-adamantyl groups, where positions of 15 hydrogen atoms could not be located properly. The second B-level alert of **3a** (PLAT201\_ALERT\_2\_B Isotropic non-H Atoms in Main Residue(s) ..... 1 Report) is also due to a disorder of the C(13) atom in a mirror plane, which was solved isotropically. The third B-level alert of **3a** (PLAT340\_ALERT\_3\_B Low Bond Precision on C-C Bonds ..... 0.01013 Ang) is due to the heavy disorders as mentioned above.

Crystallographic data for the structure of **3a** has been deposited with the Cambridge Crystallographic Data Centre as supplementary publication no. CCDC-1974229. These data can be obtained free of charge from the Cambridge Crystallographic Data Centre via [www.ccdc.cam.ac.uk/data\\_request/cif](http://www.ccdc.cam.ac.uk/data_request/cif).

**Table S1.** Data collection parameters.

| compound                                                      | 3a                                              |
|---------------------------------------------------------------|-------------------------------------------------|
| CCDC number                                                   |                                                 |
| chemical formula                                              | C <sub>28</sub> H <sub>35</sub> NP <sub>2</sub> |
| formula weight                                                | 447.54                                          |
| crystal size (mm <sup>3</sup> )                               | 0.29 × 0.16 × 0.11                              |
| crystal color, habit                                          | colorless, plate                                |
| crystal system                                                | orthorhombic                                    |
| space group                                                   | <i>Pnma</i> (#62)                               |
| <i>a</i> (Å)                                                  | 14.2420(9)                                      |
| <i>b</i> (Å)                                                  | 10.3185(7)                                      |
| <i>c</i> (Å)                                                  | 16.3776(9)                                      |
| $\alpha$ (deg)                                                | 90                                              |
| $\beta$ (deg)                                                 | 90                                              |
| $\gamma$ (deg)                                                | 90                                              |
| <i>V</i> (Å <sup>3</sup> )                                    | 2406.8(3)                                       |
| <i>Z</i>                                                      | 4                                               |
| <i>D</i> <sub>calcd</sub> (g cm <sup>-3</sup> )               | 1.235                                           |
| <i>F</i> (000)                                                | 960                                             |
| $\mu$ <sub>calcd</sub> (cm <sup>-1</sup> )                    | 1.966                                           |
| radiation                                                     | Mo-K $\alpha$ ( $\lambda$ = 0.71075 Å)          |
| temperature (°C)                                              | -95.0                                           |
| transmission factors range                                    | 0.560 – 0.979                                   |
| no. measured reflections                                      | 19428                                           |
| no. unique reflections                                        | 2989 ( <i>R</i> <sub>int</sub> = 0.0812)        |
| no. refined parameters                                        | 152                                             |
| <i>R</i> 1 ( <i>I</i> > 2 $\sigma$ ( <i>I</i> )) <sup>a</sup> | 0.1398                                          |
| <i>wR</i> 2 (all data) <sup>b</sup>                           | 0.2519                                          |
| GOF <sup>c</sup>                                              | 1.000                                           |

<sup>a</sup>  $R1 = \Sigma||Fo| - |Fc|| / \Sigma|Fo|$ .<sup>b</sup>  $wR2 = [\Sigma(w(Fo^2 - Fc^2)^2) / \Sigma w(Fo^2)^2]^{1/2}$ ;  $w = 1 / [\sigma^2(Fo^2) + 17.65P]$ , where  $P = (Fo^2 + 2Fc^2) / 3$ .<sup>c</sup>  $GOF = [\Sigma w(Fo^2 - Fc^2)^2 / (N_{obs} - N_{params})]^{1/2}$ .

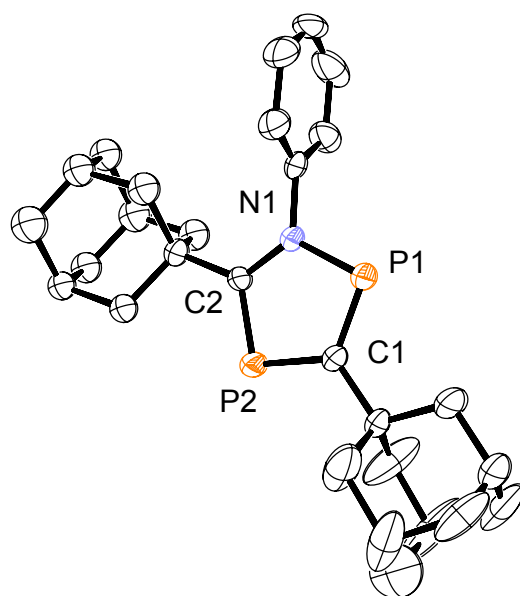

**Figure S1.** ORTEP drawing of **3a**. Hydrogen atoms are omitted for clarity. Selected bond lengths (Å) and angles (°): P1–C1, 1.696(7); P1–N1, 1.710(5); P2–C2, 1.737(7); P2–C1, 1.755(7); N1–C2, 1.383(8); C1–P1–N1, 95.5(3); C2–P2–C1, 95.9(3); C2–N1–C3, 127.1(5); C2–N1–P1, 119.2(4); C3–N1–P1, 113.7(4).

#### 4. References

- S1. (a) N. A. Noureldin, J. W. Bellegarde, *Synthesis*, 1999, 939-942. (b) H. Takahashi, T. Ishioka, Y. Koiso, M. Sodeoka, Y. Hashimoto, *Biol. Pharm. Bull.*, 2000, **23**, 1387-1390. (c) Y. Xiao, X. Wu, H. Wang, S. Sun, J. Yu, J. Cheng, *Org. Lett.*, 2019, **21**, 2565-2568.
- S2. (a) J. G. Cordaro, D. Stein, H. Grützmacher, *J. Am. Chem. Soc.*, 2006, **128**, 14962-14971. (b) K. Nakajima, S. Takata, K. Sakata, Y. Nishibayashi, *Angew. Chem. Int. Ed.*, 2015, **54**, 7597-7601.
- S3. CrystalStructure 4.2.2: Crystal Structure Analysis Package, Rigaku Corporation (2000-2016). Tokyo 196-8666, Japan.
- S4. G. M. Sheldrick, *Acta Cryst.*, 2008, **A64**, 112-122.
- S5. (a) International Tables for Crystallography, Vol. C (1992), Ed. A. J. C. Wilson, Kluwer Academic Publishers, Dordrecht, Netherlands, Table 6.1.1.4, pp. 572. (b) J. A. Ibers, W. C. Hamilton, *Acta Crystallogr.*, 1964, **17**, 781. (c) D. C. Creagh, W. J. McAuley, "International Tables for Crystallography," Vol C (1992), Ed. A. J. C. Wilson, Kluwer Academic Publishers, Boston, Table 4.2.6.8, pages 219-222.



### 5. $^1\text{H}$ , $^{13}\text{C}$ and $^{31}\text{P}$ NMR spectra.

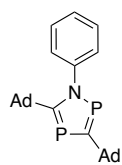

3a

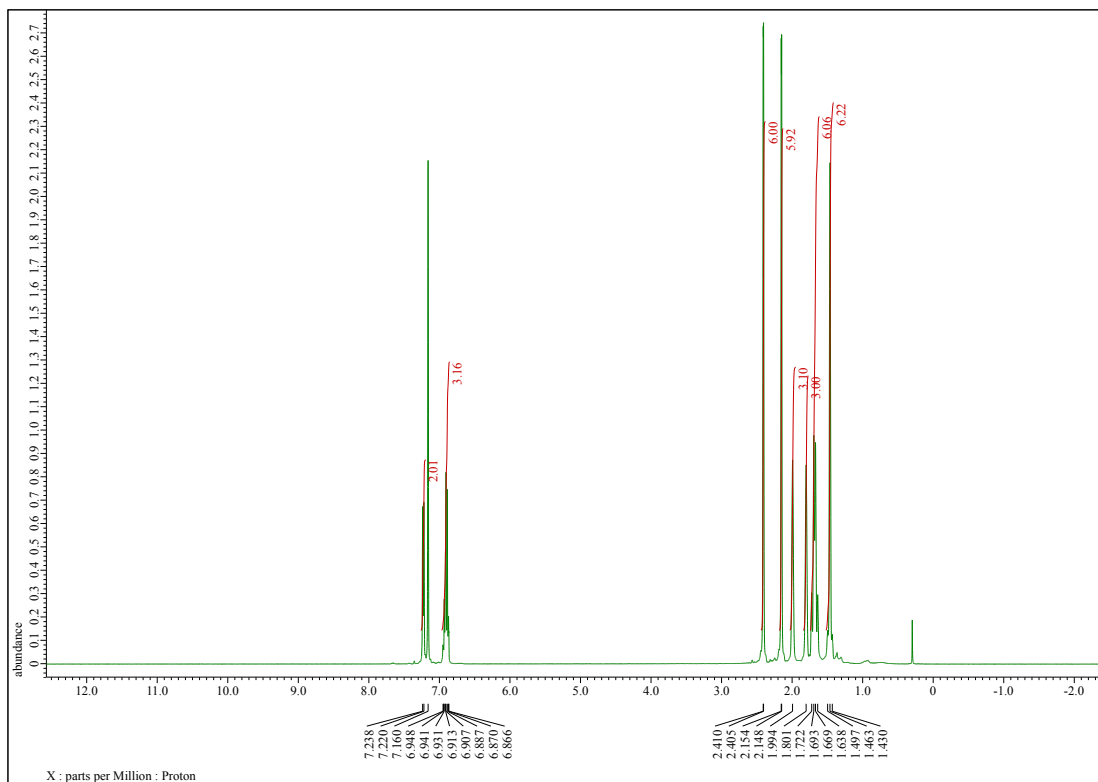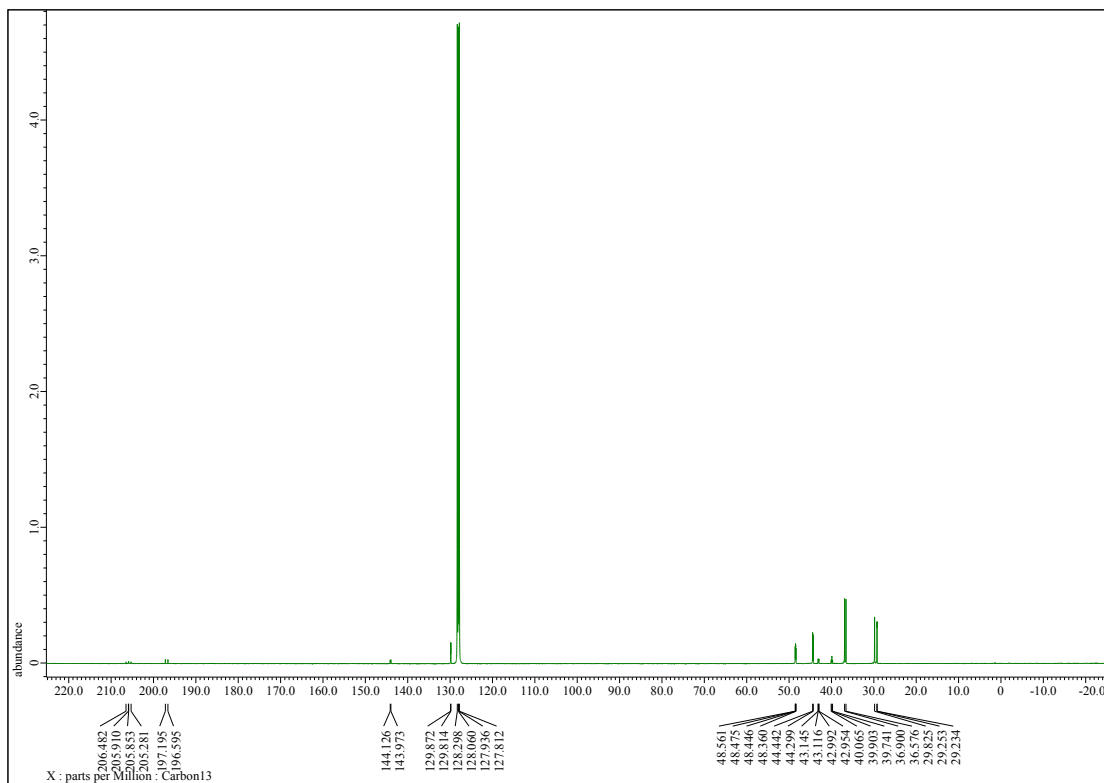

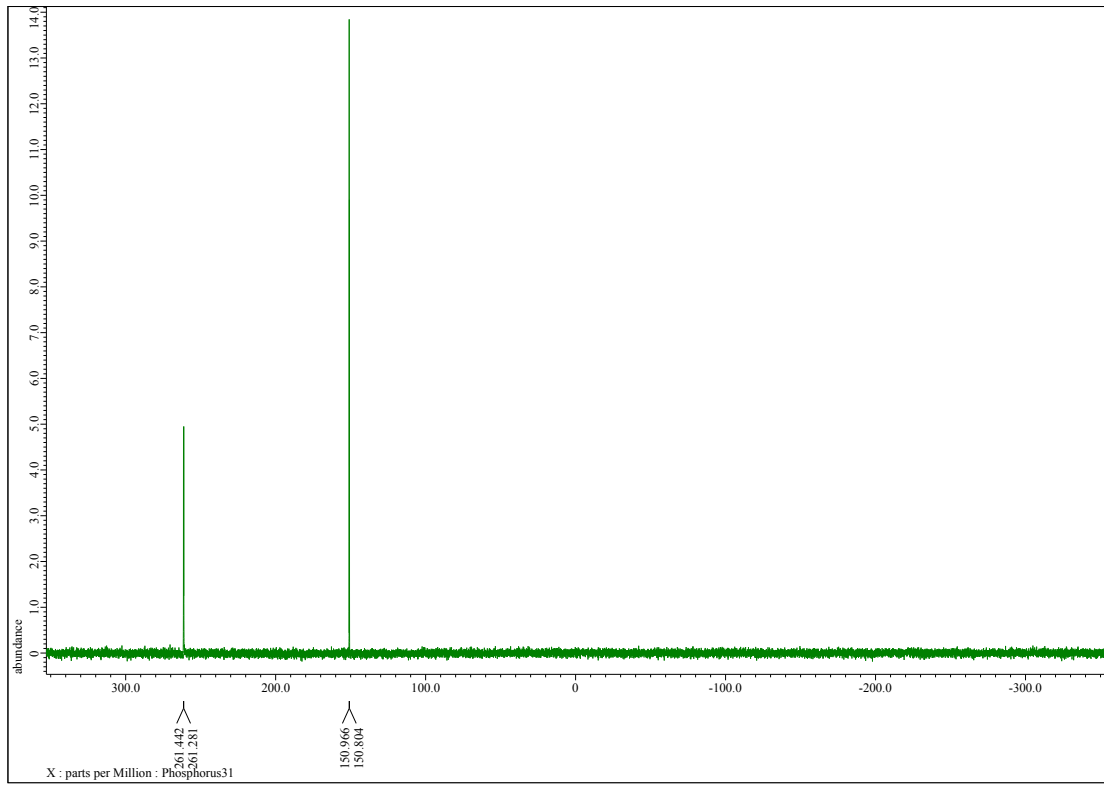

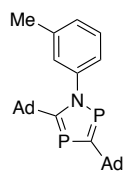

3b

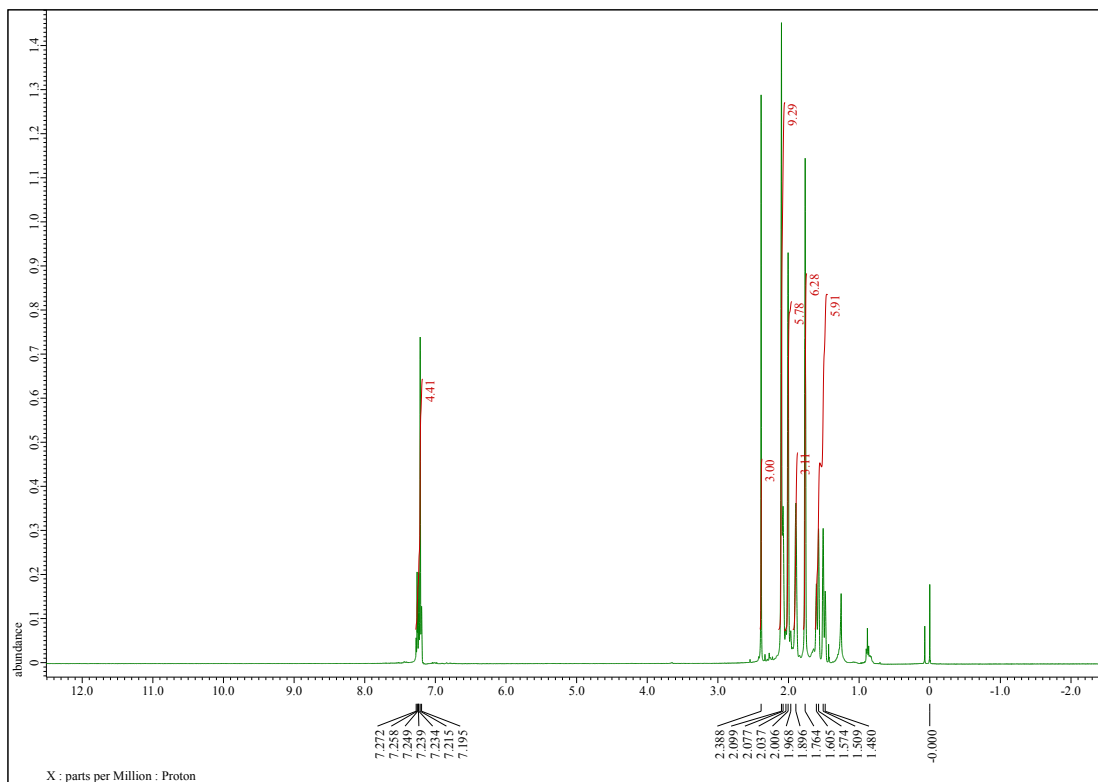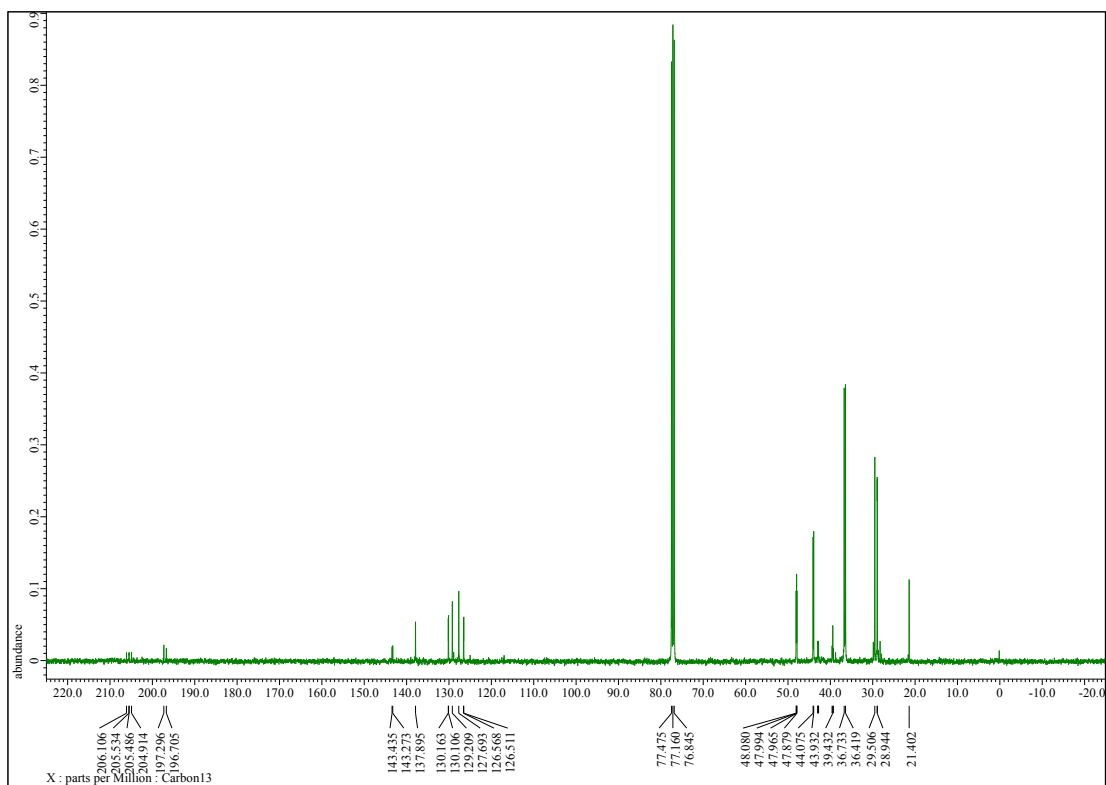

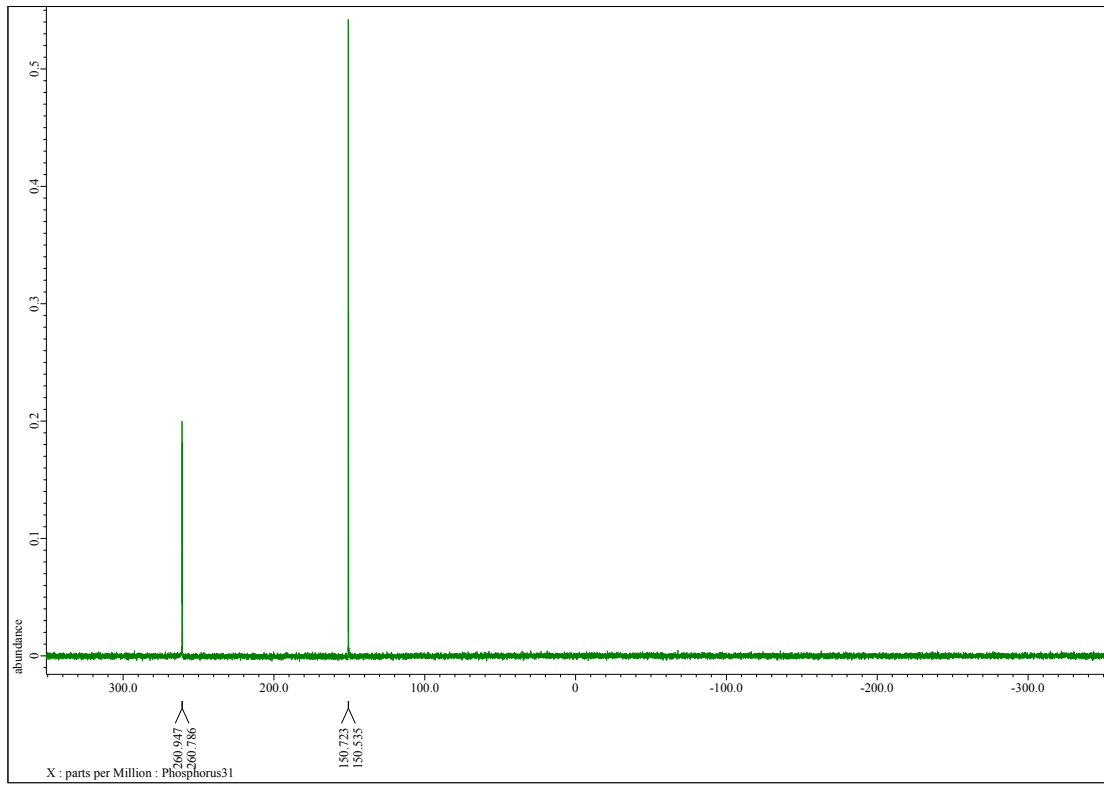

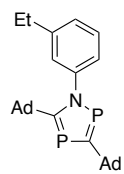

3c

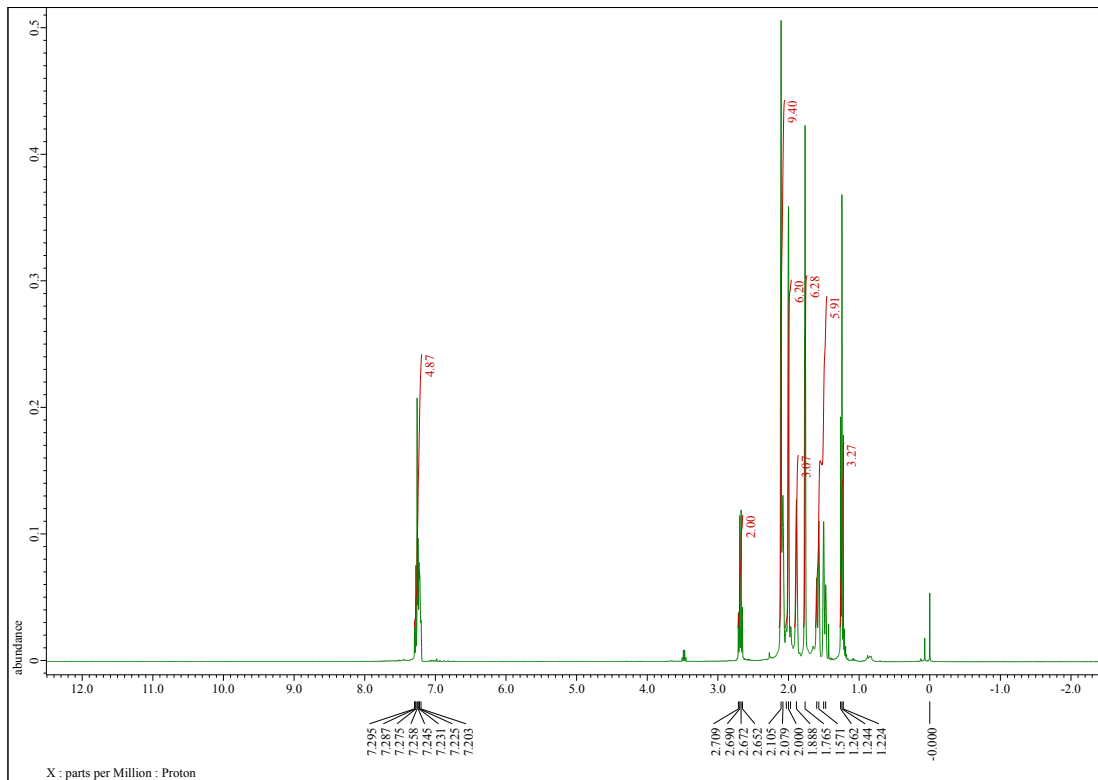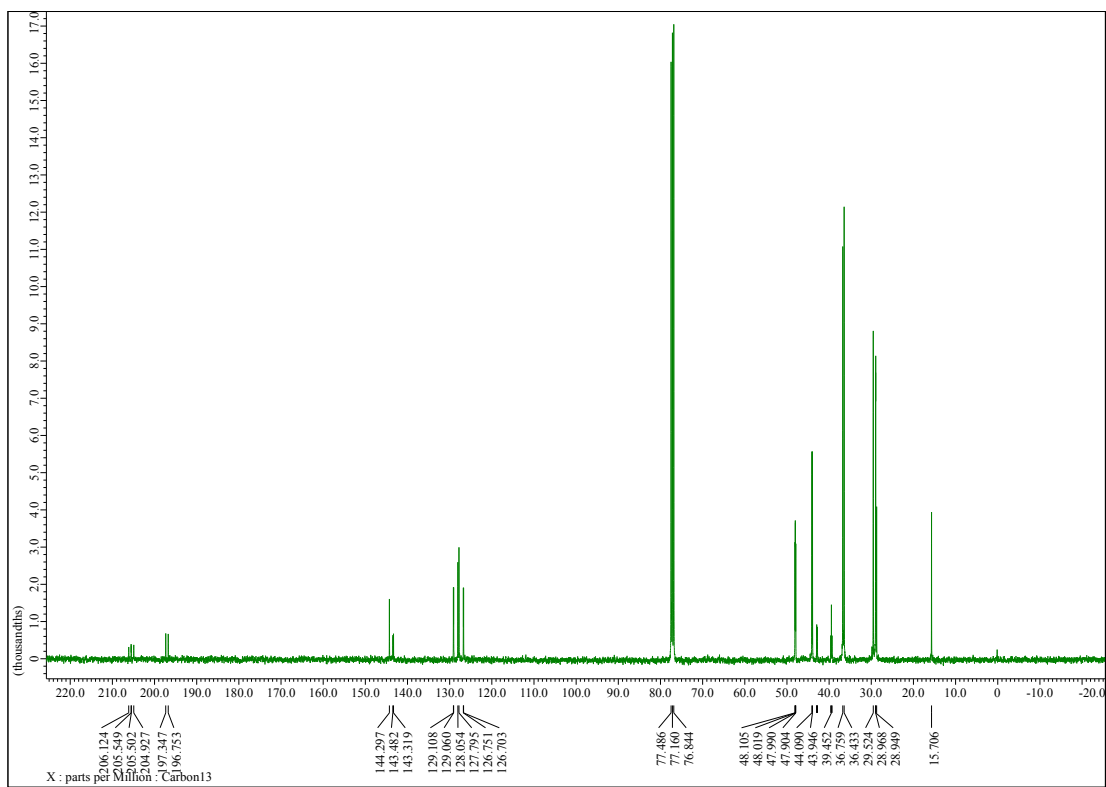

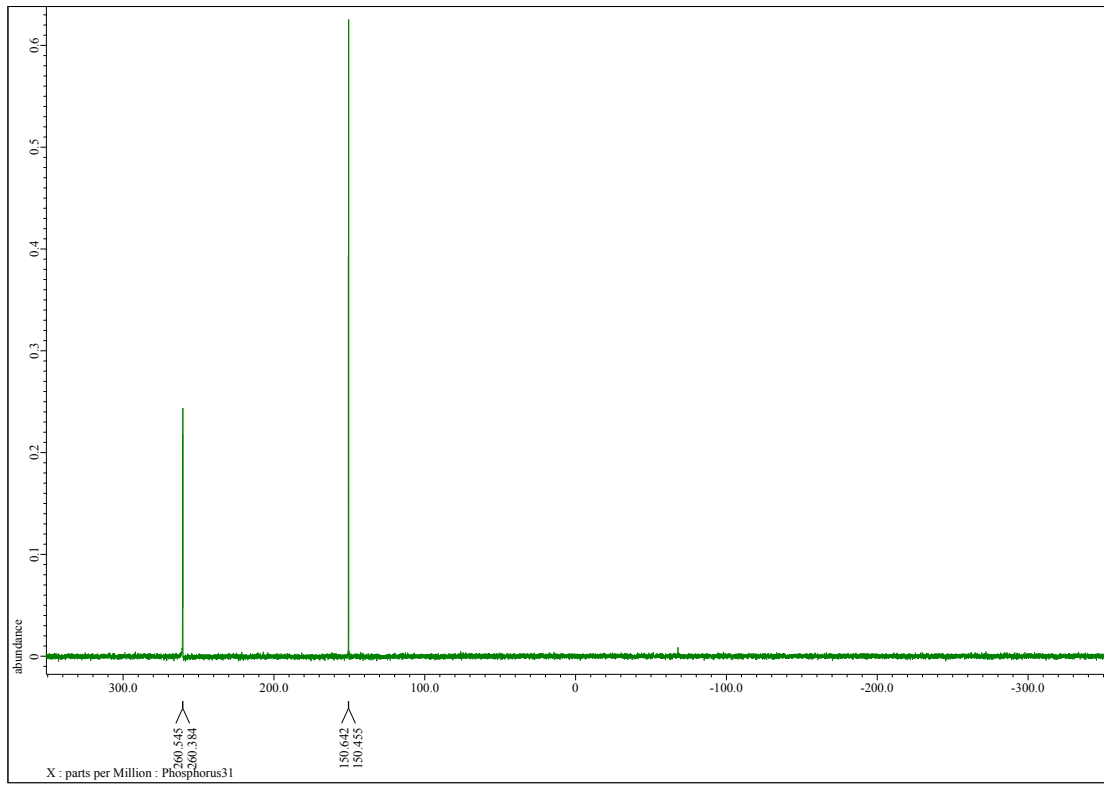

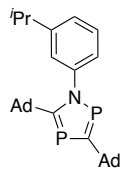

3d

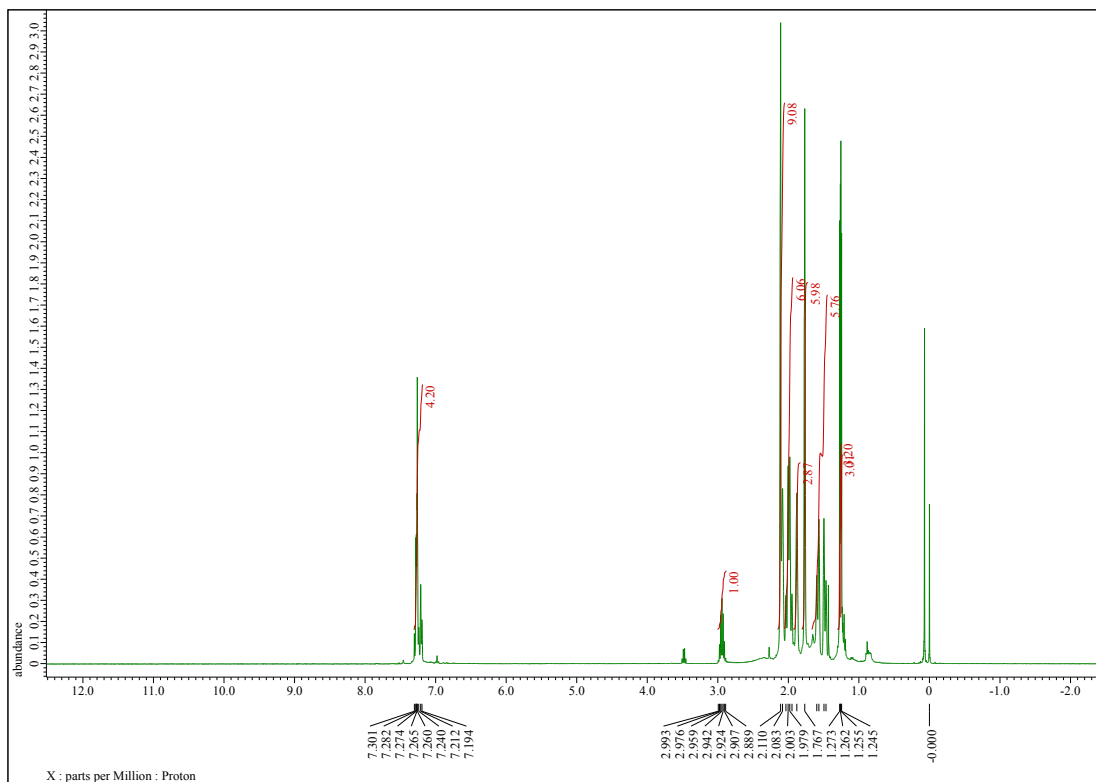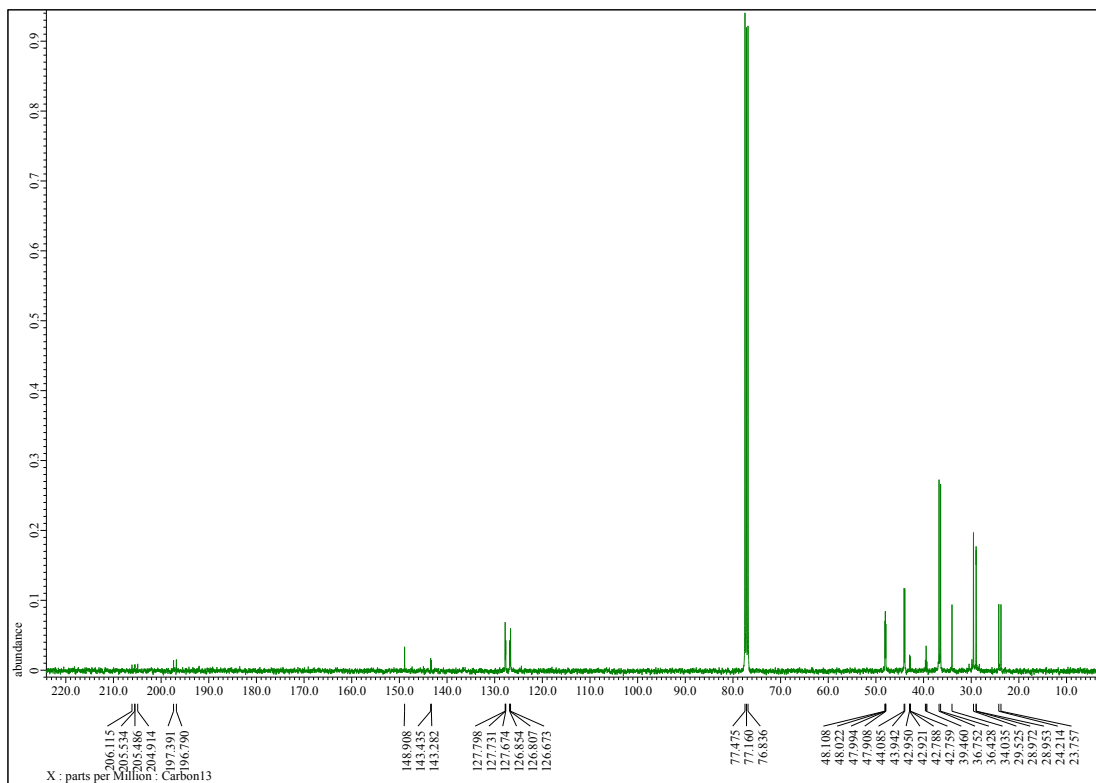

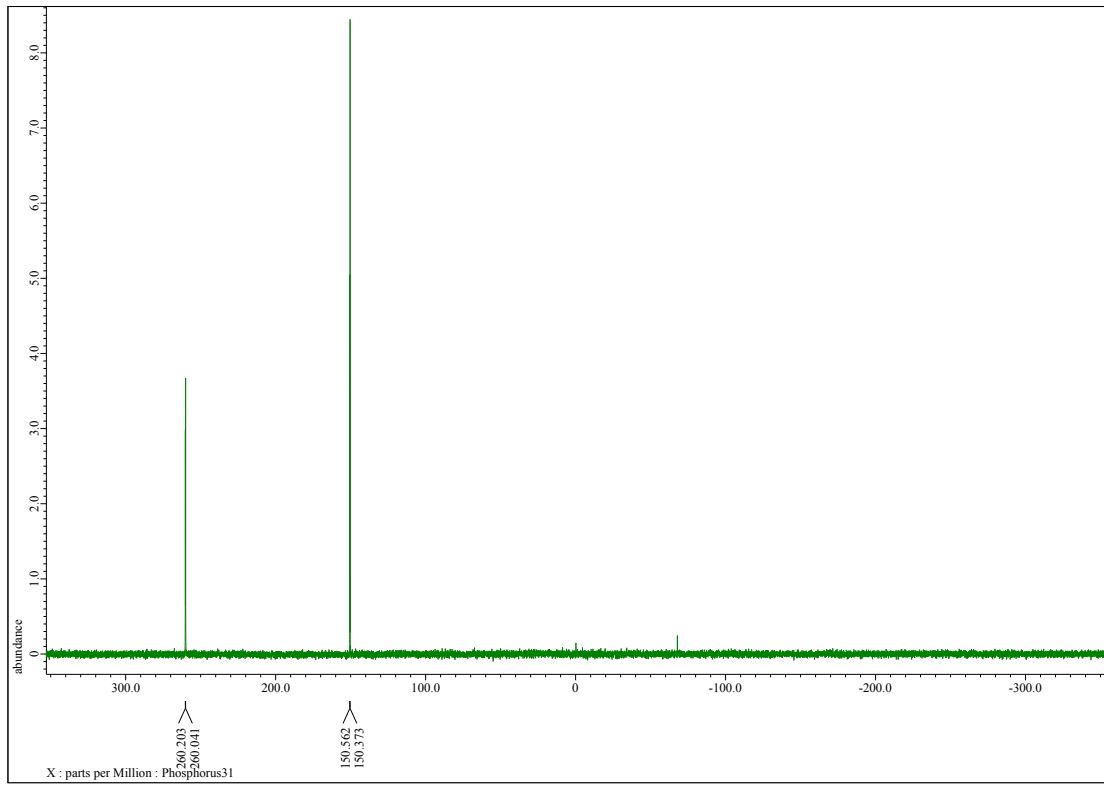



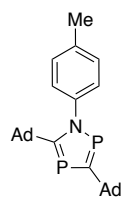

3e

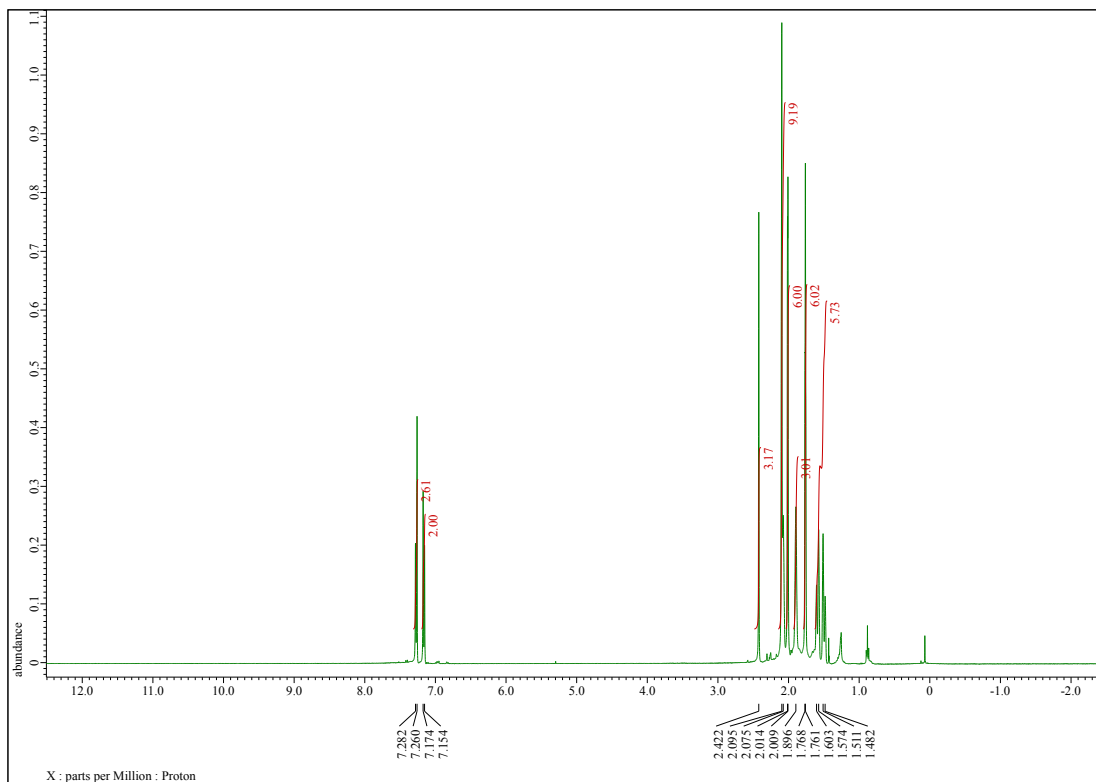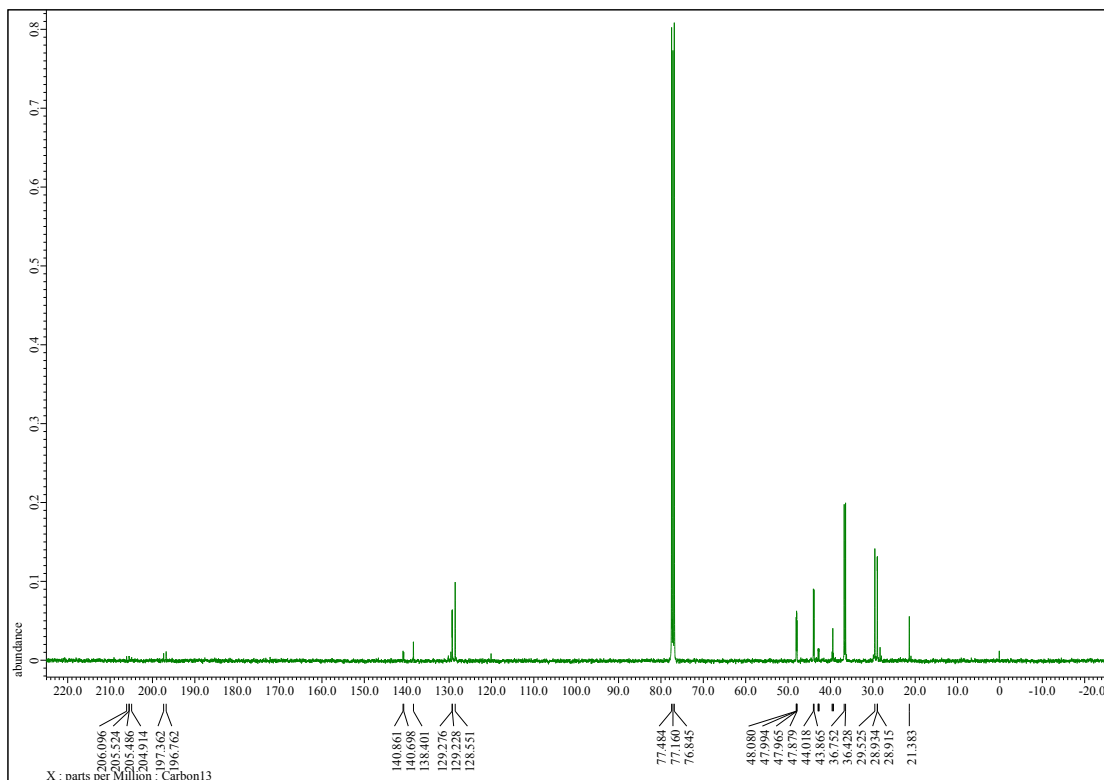

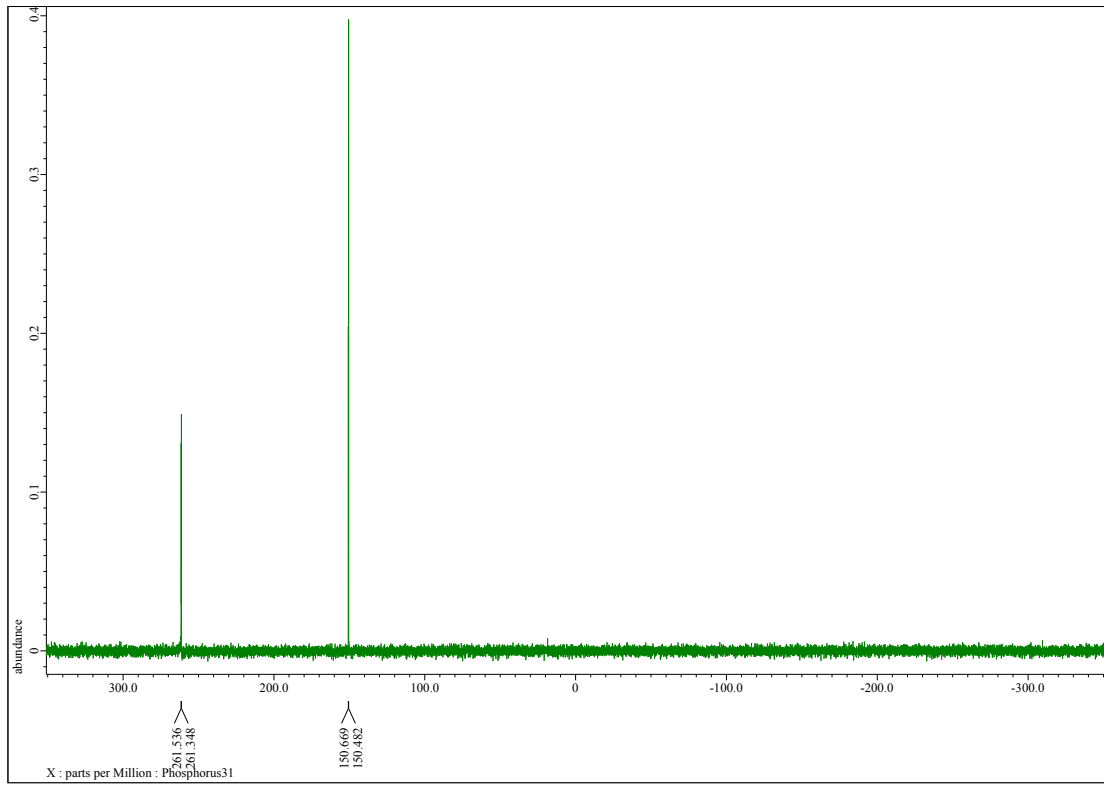

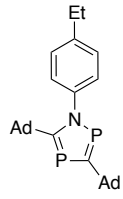

3f

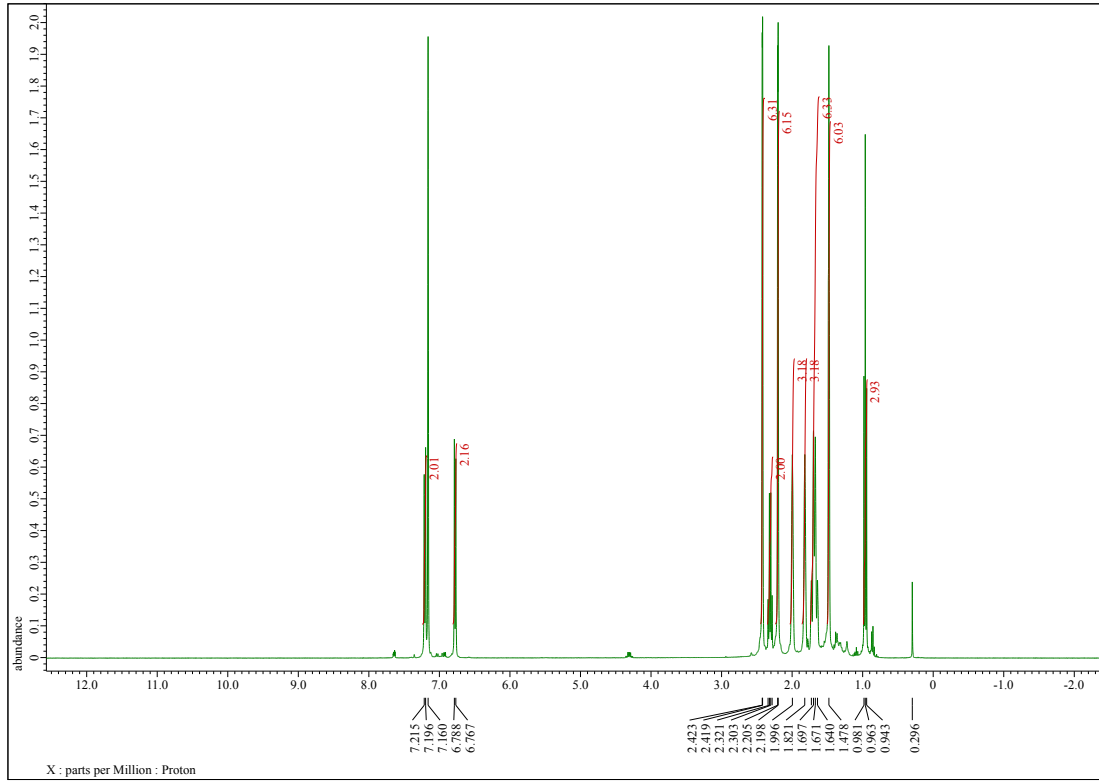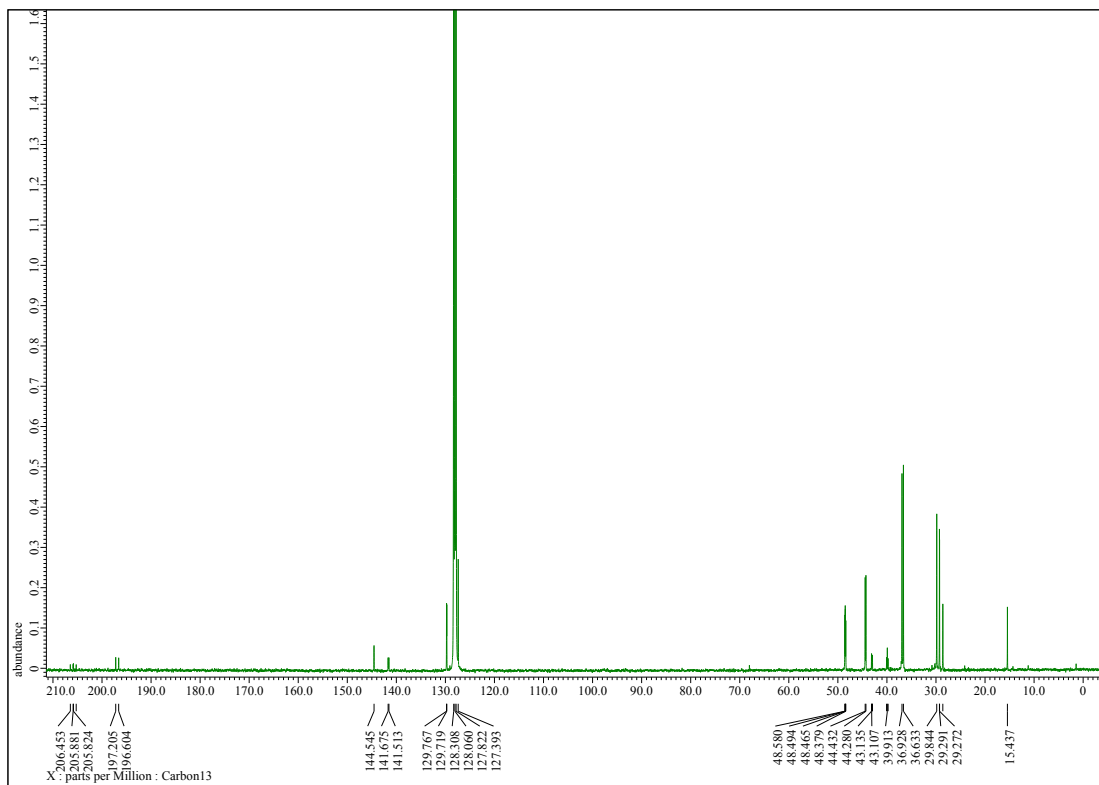

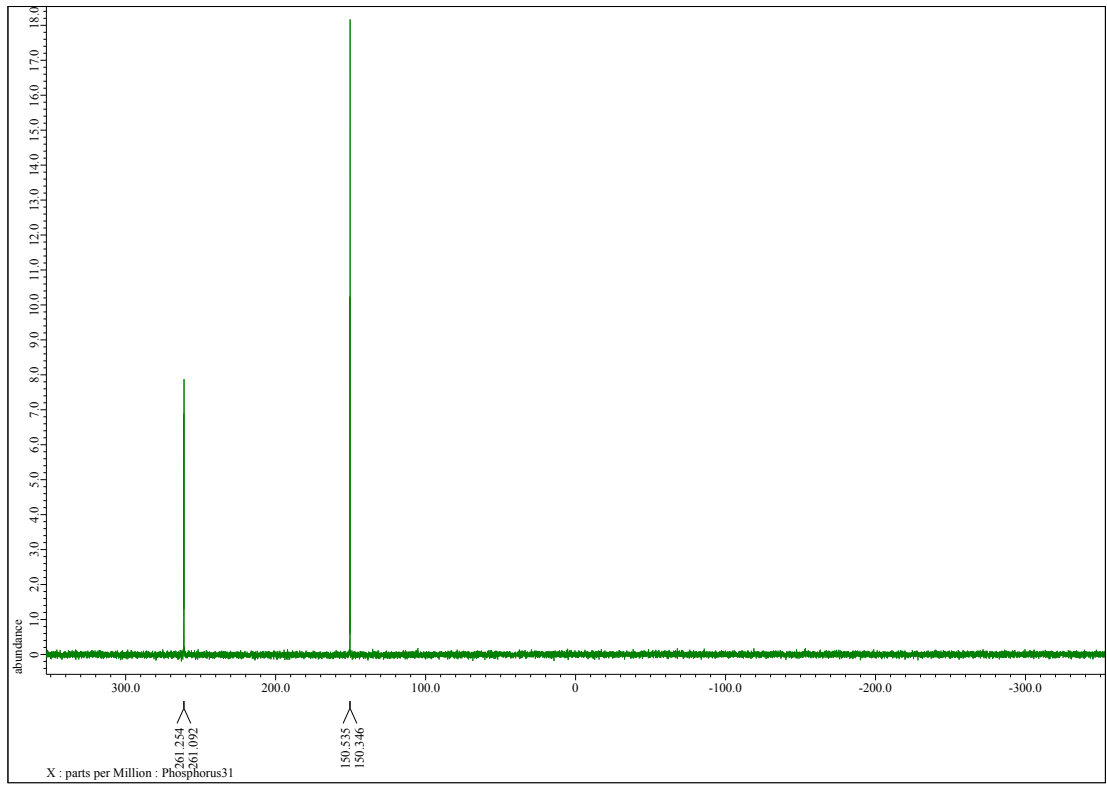

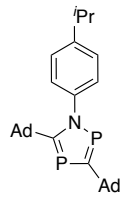

**3g**

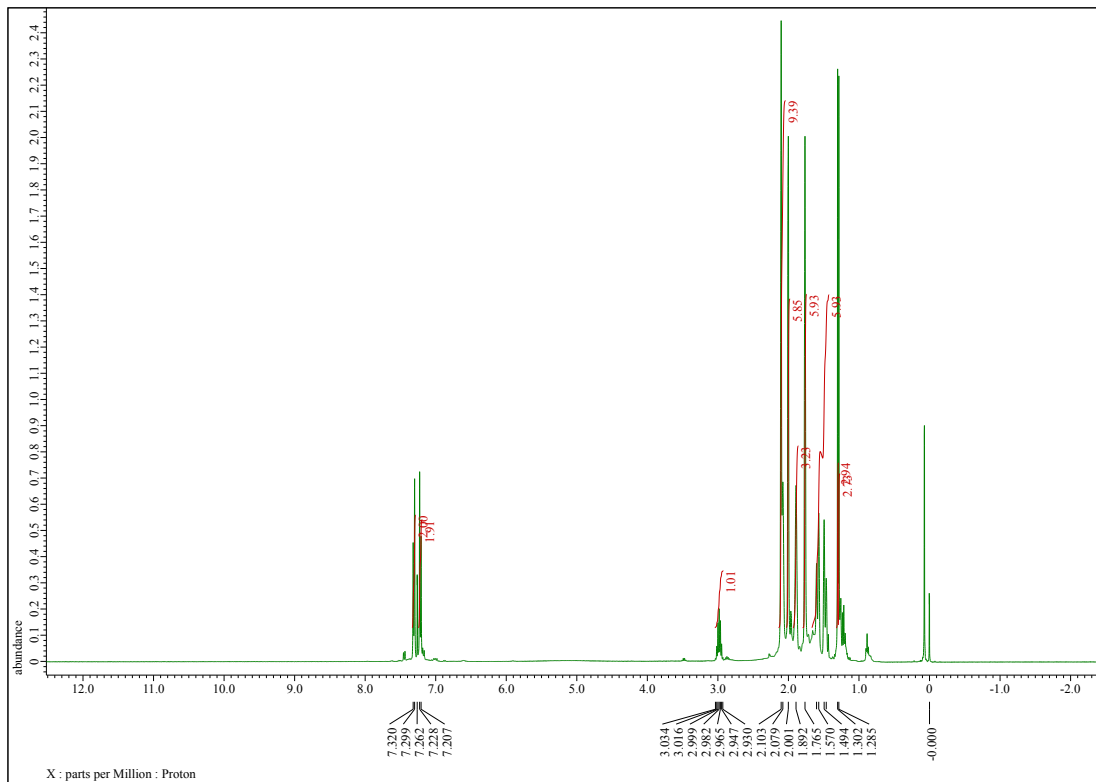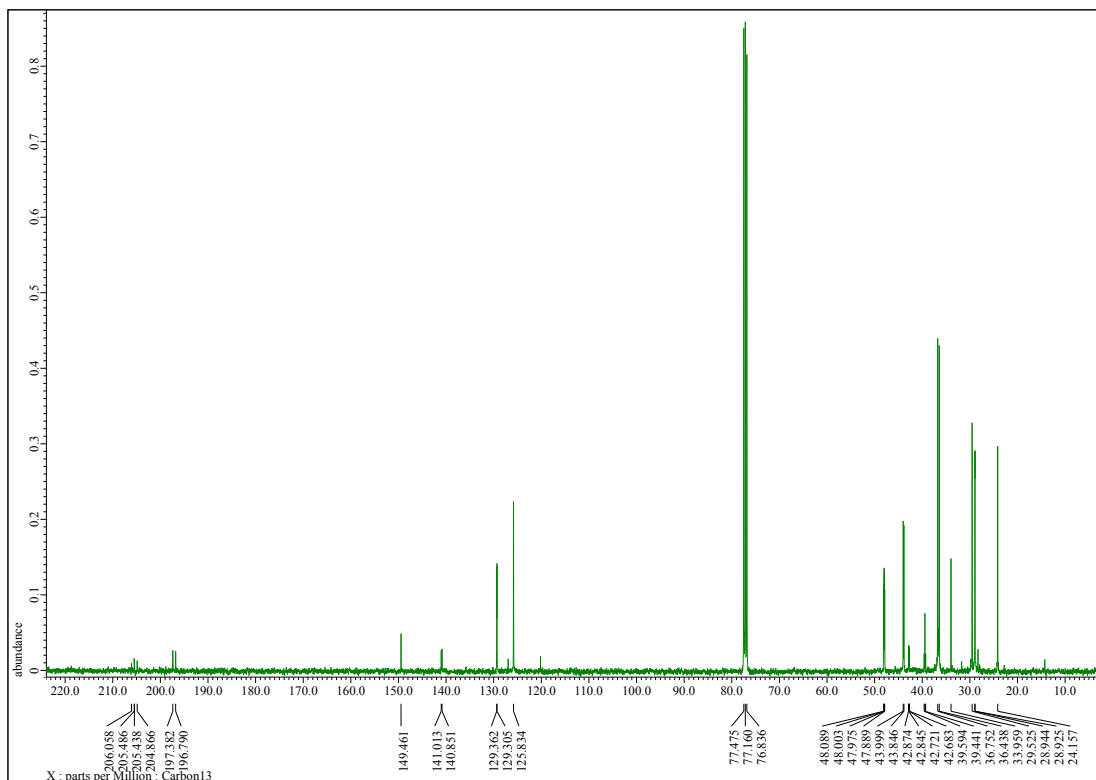

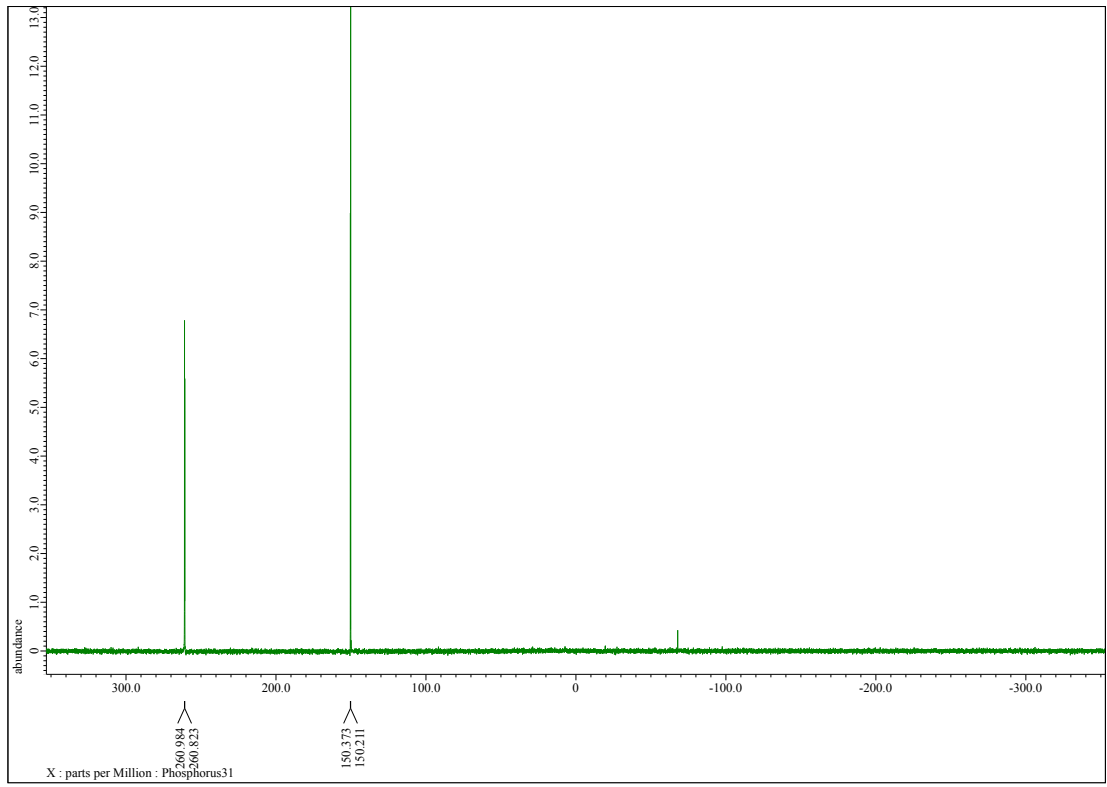

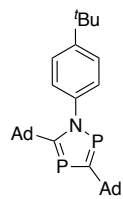

3h

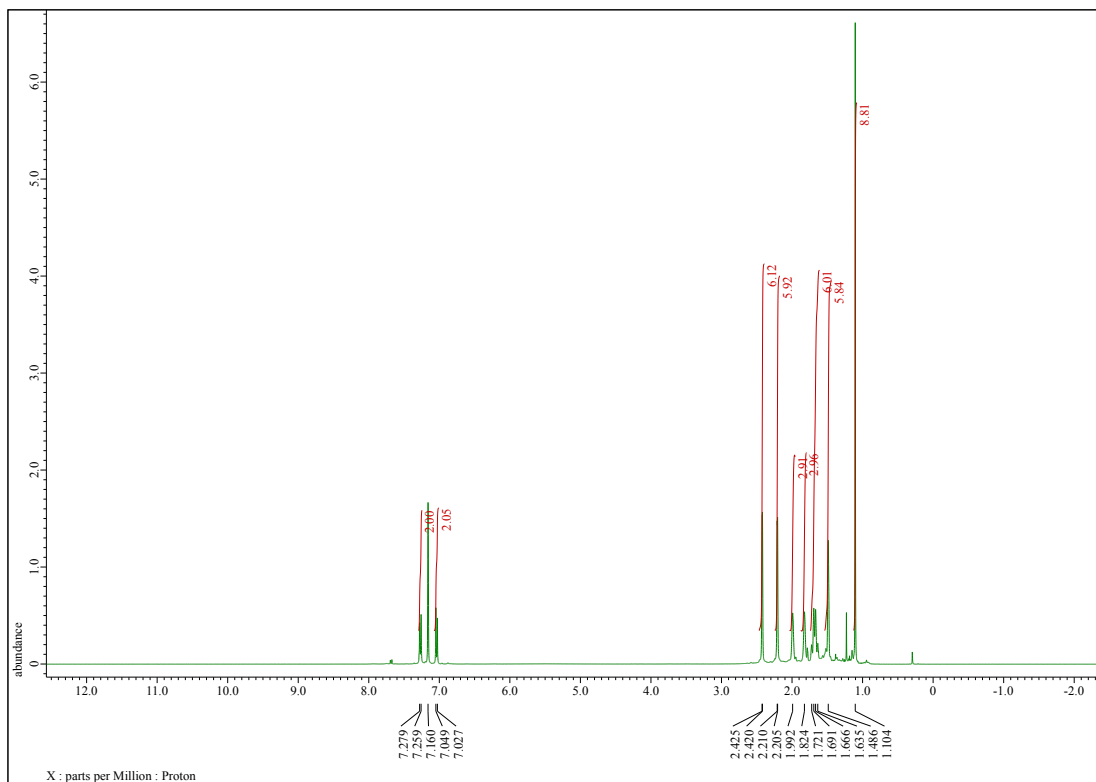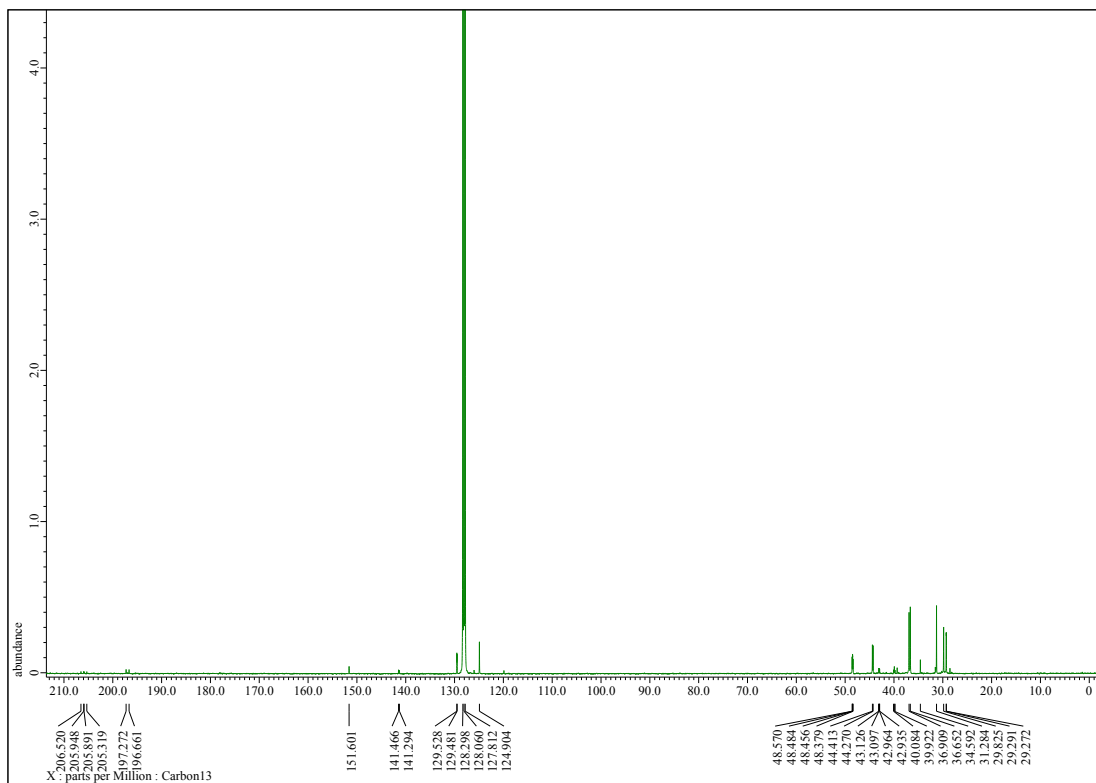

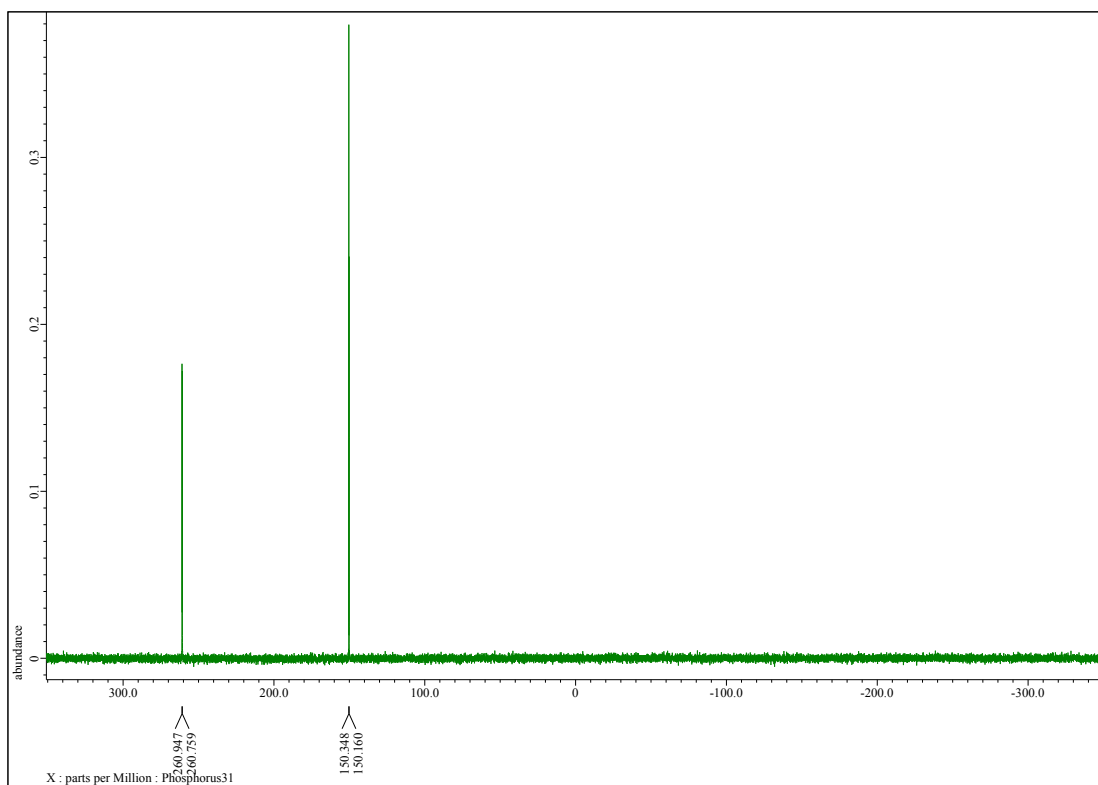



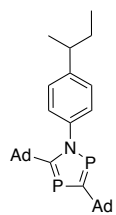

3i

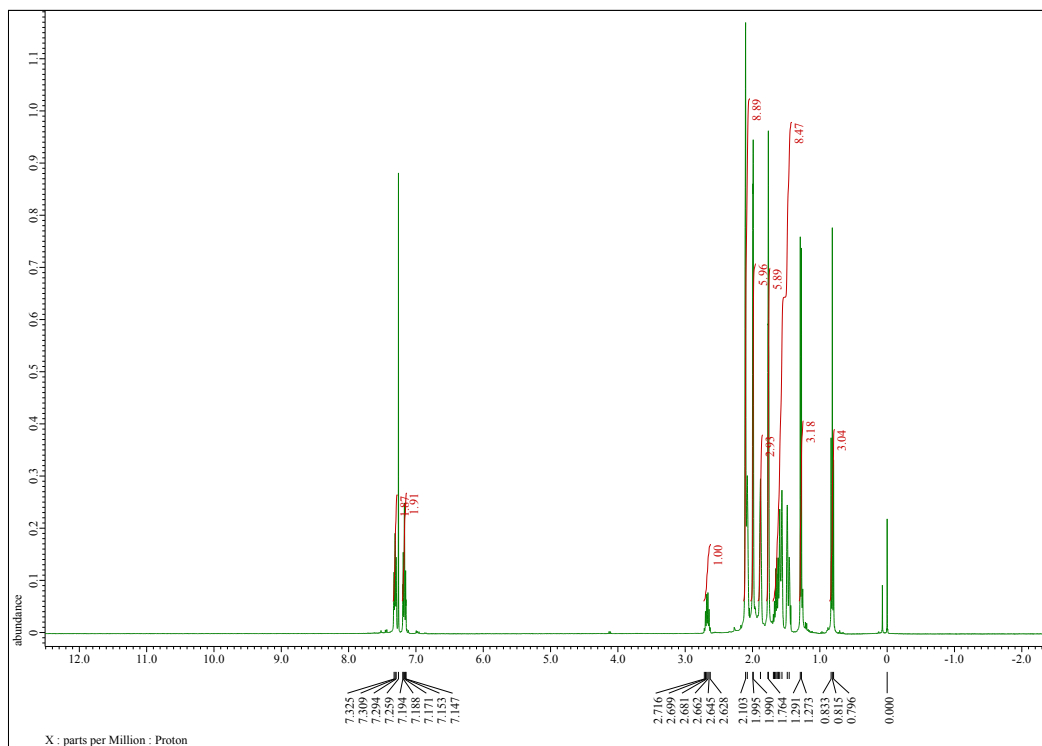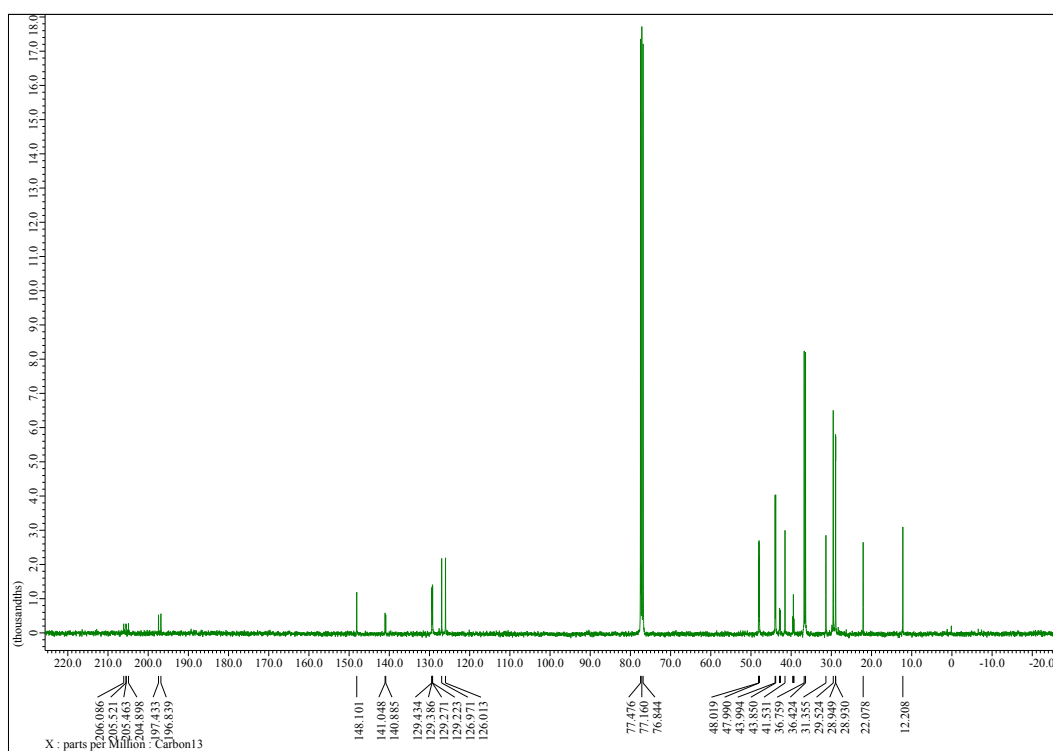

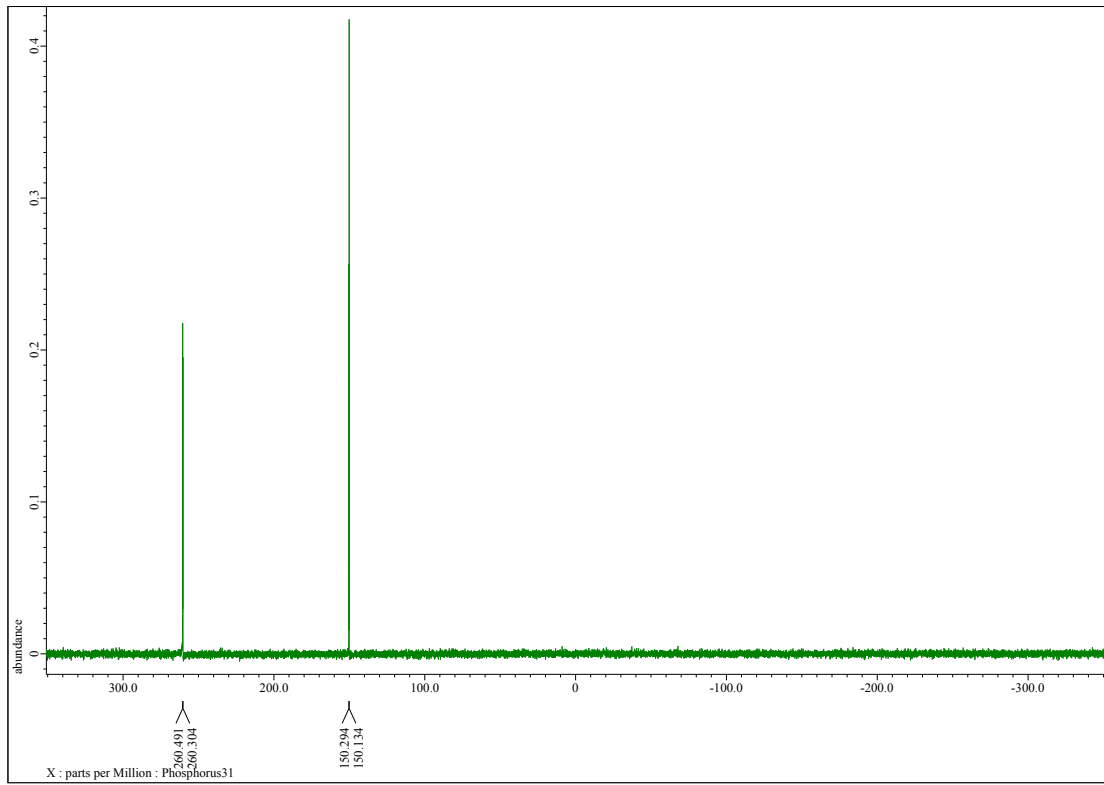

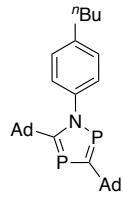

3j

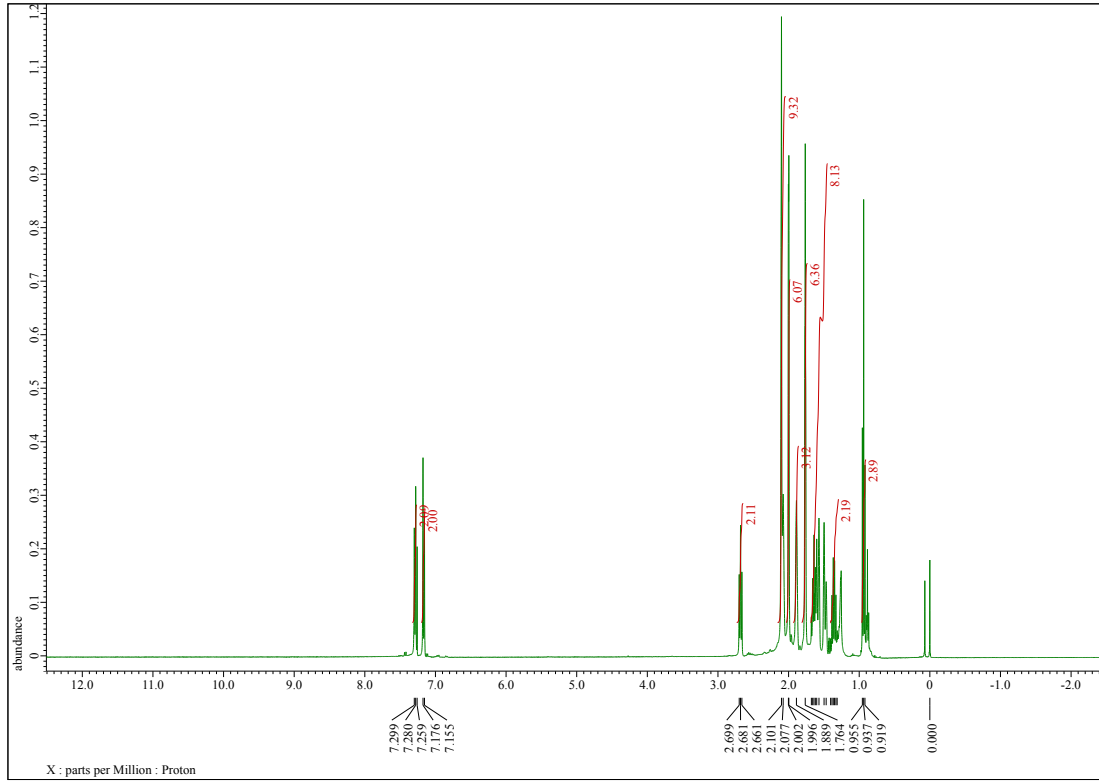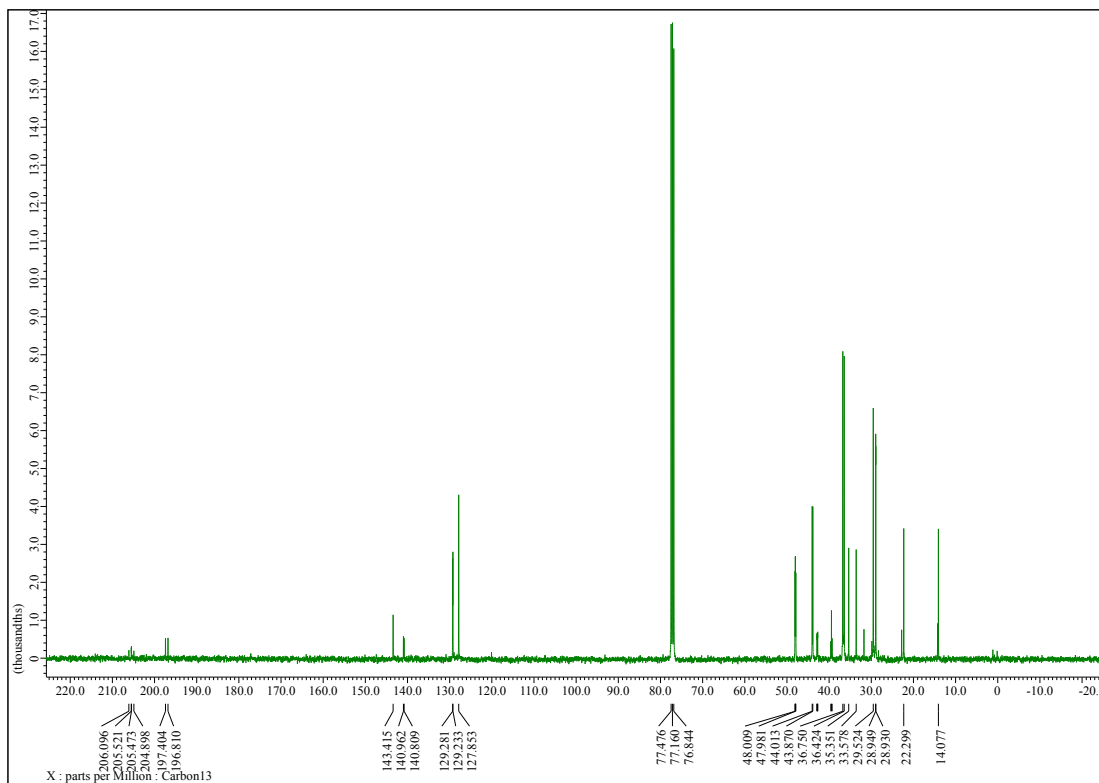

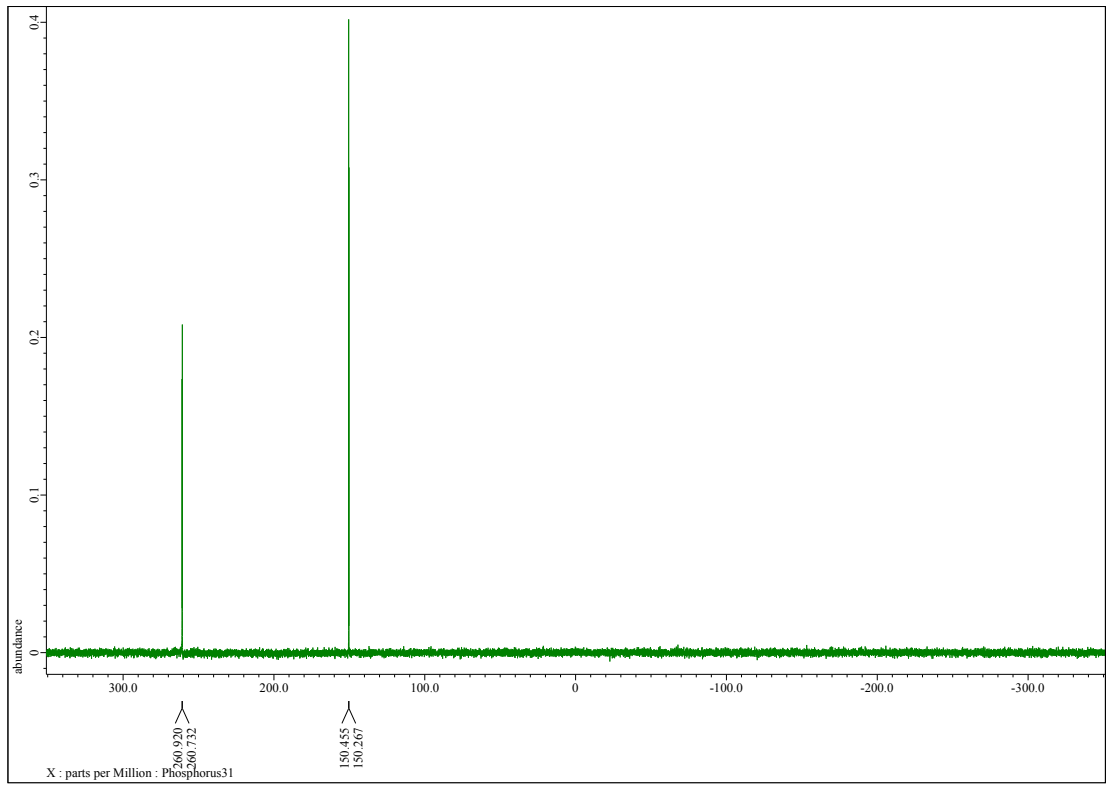

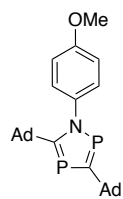

3k

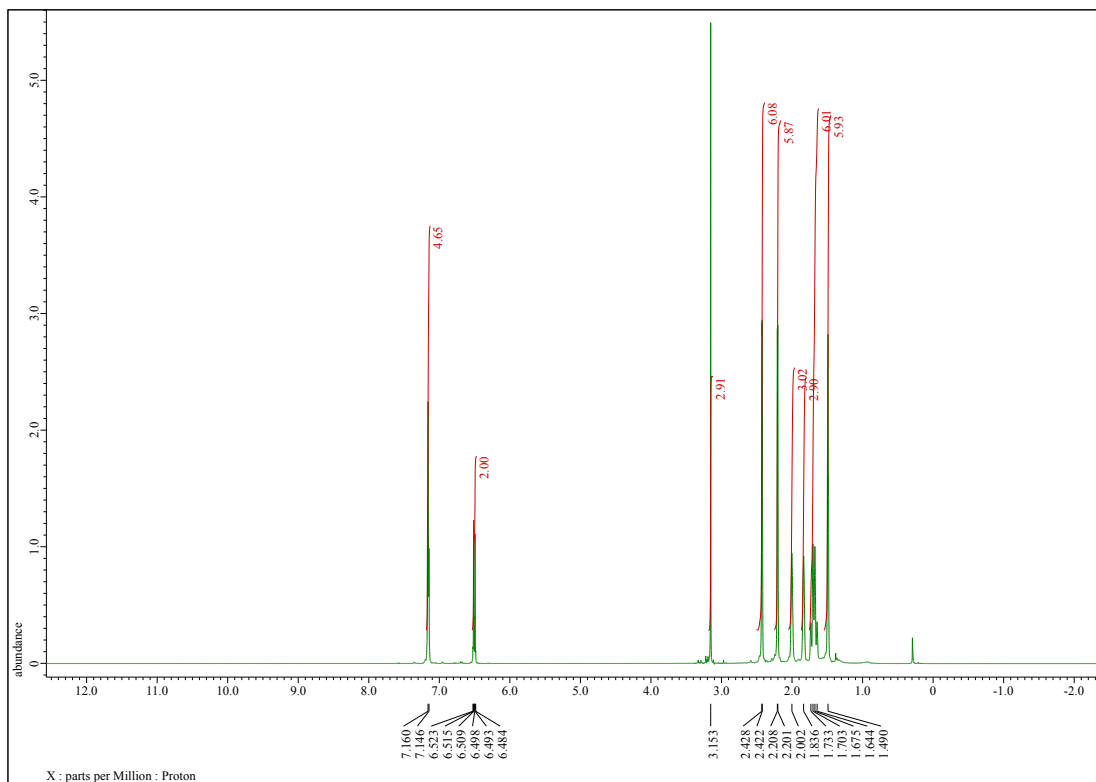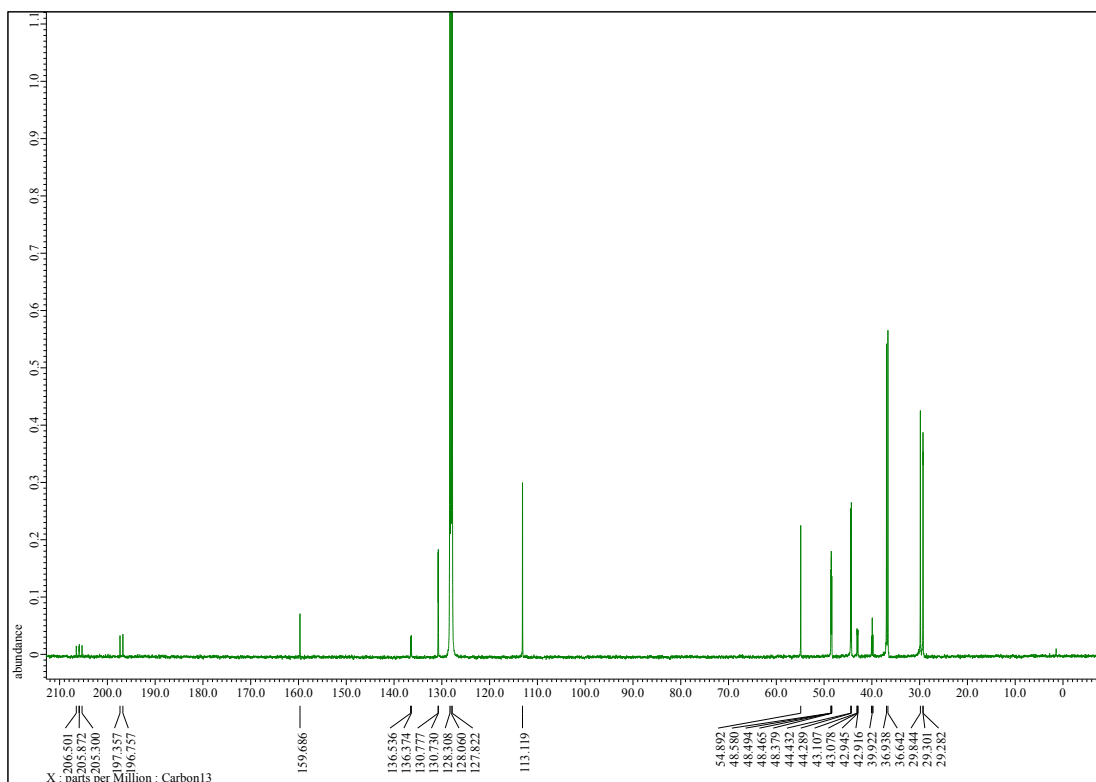

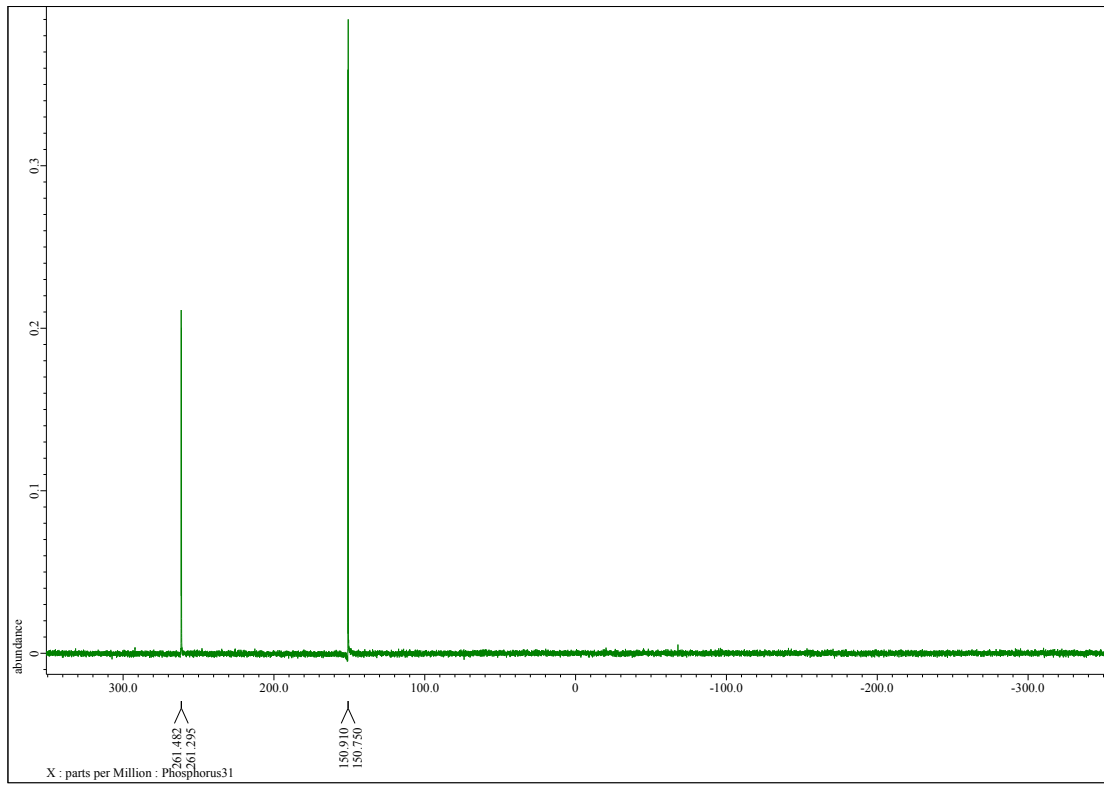

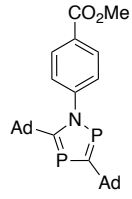

31

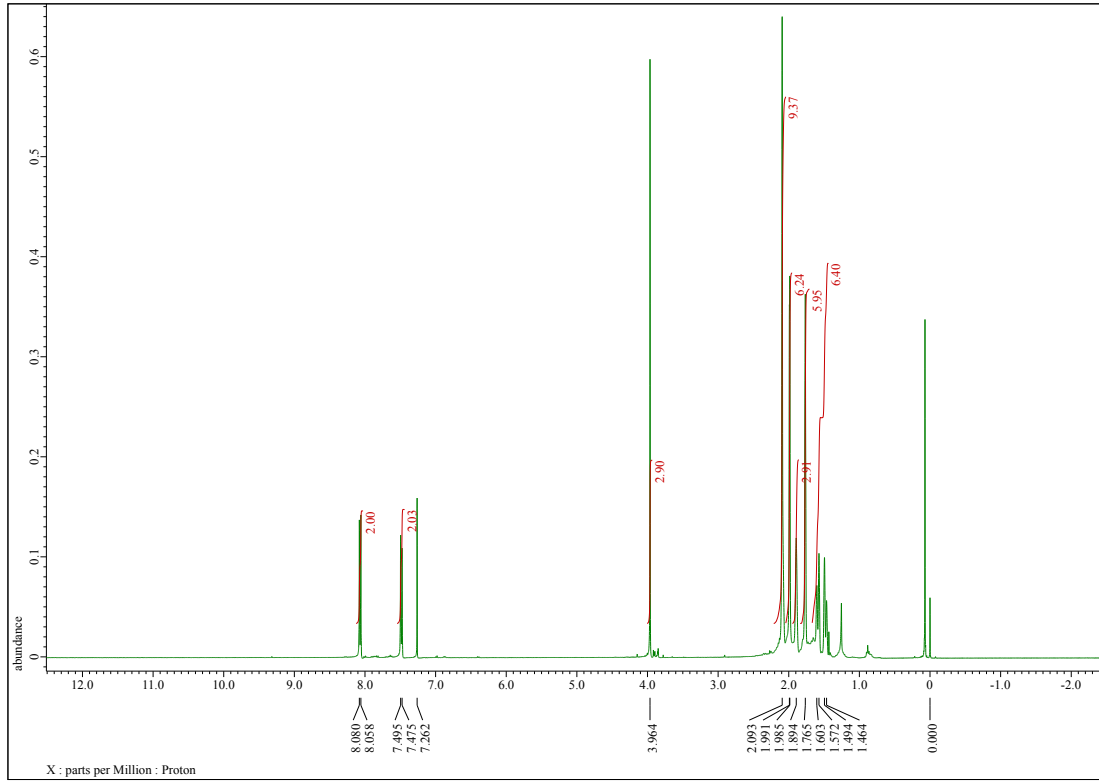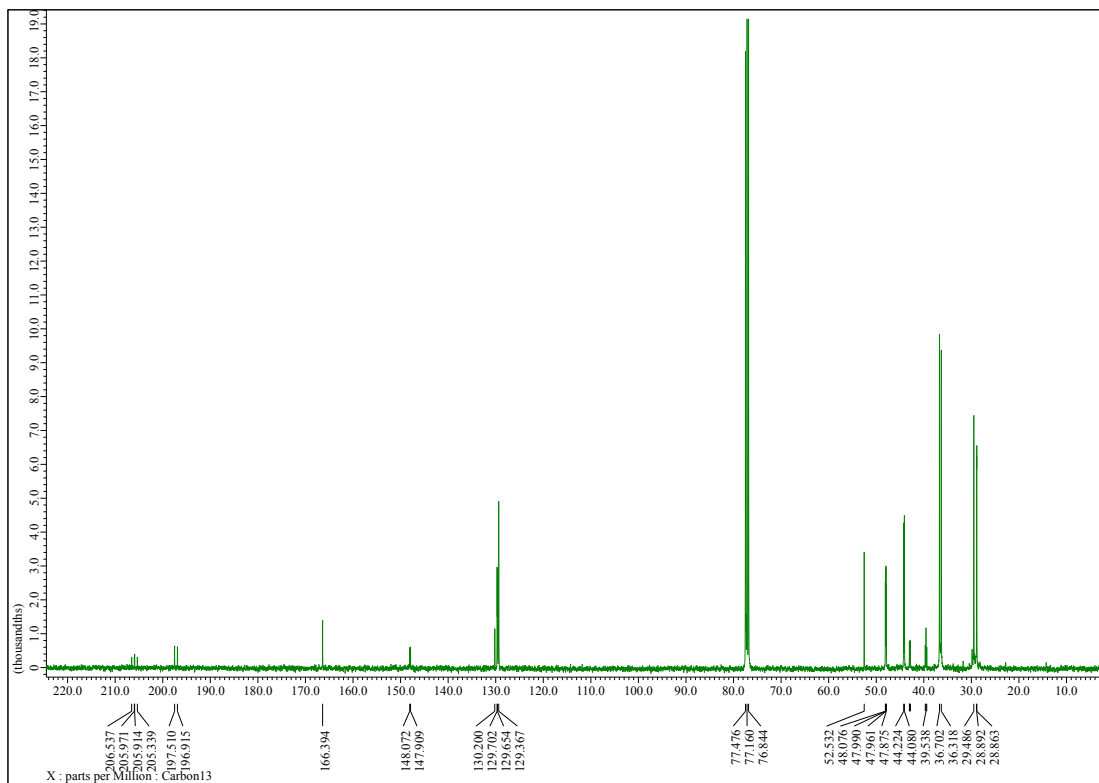

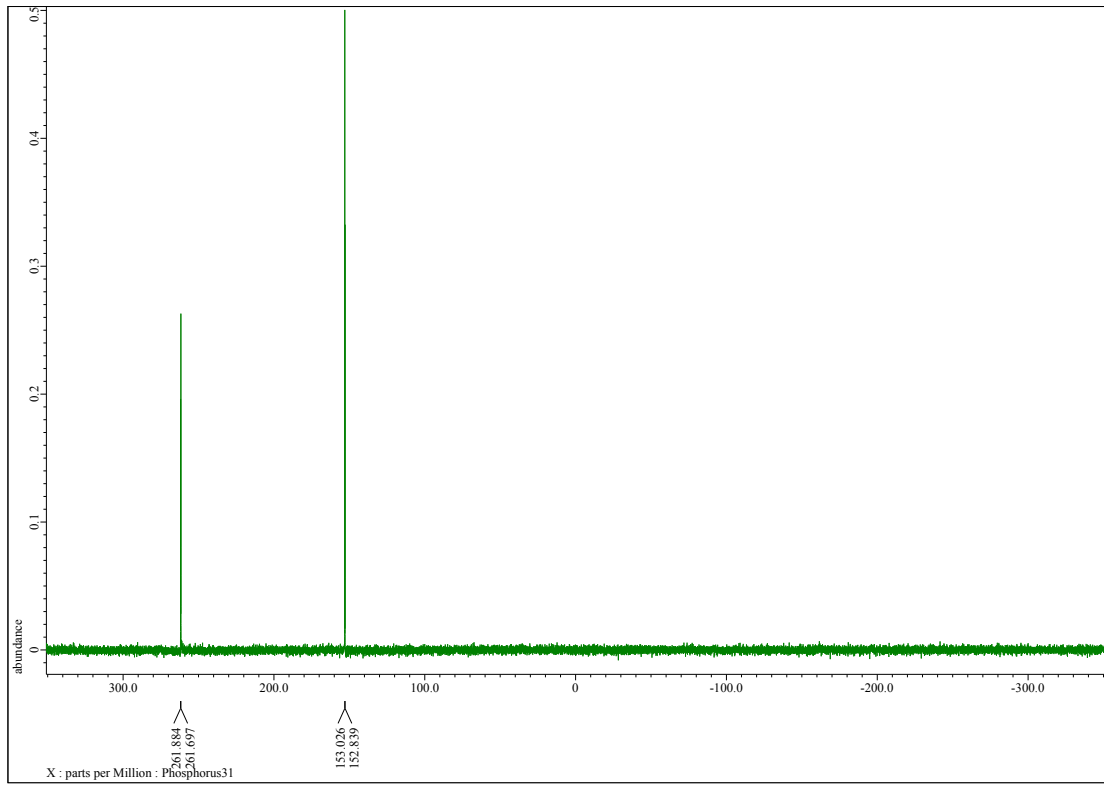



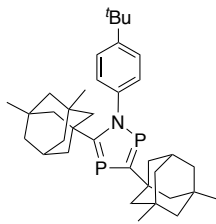

30

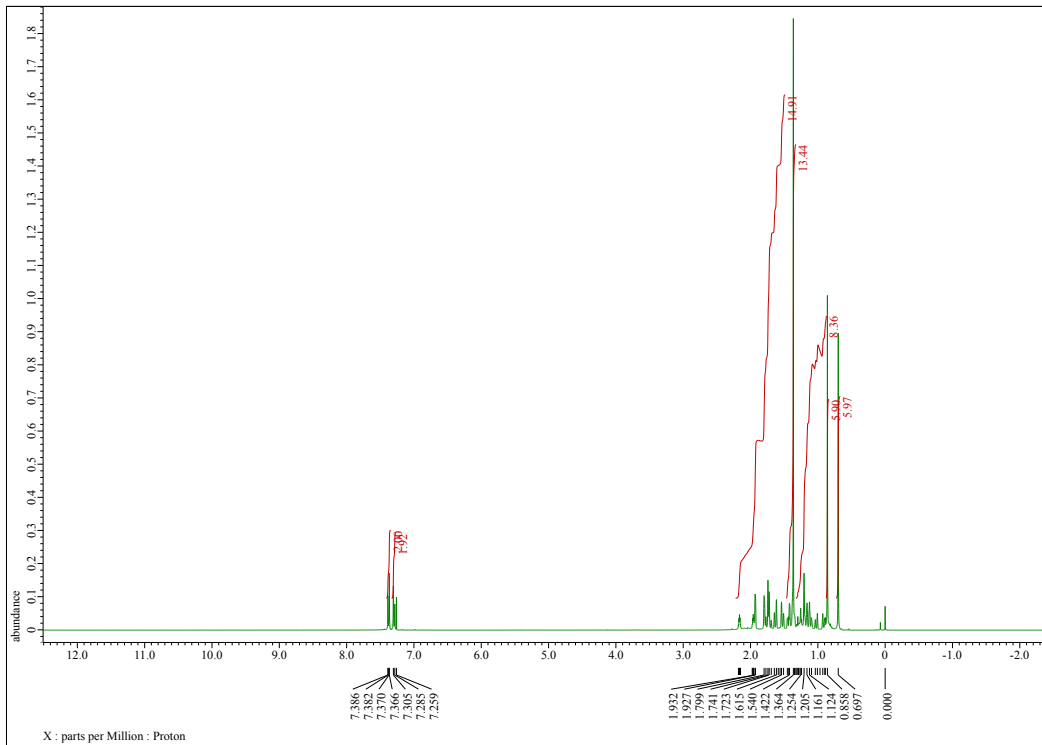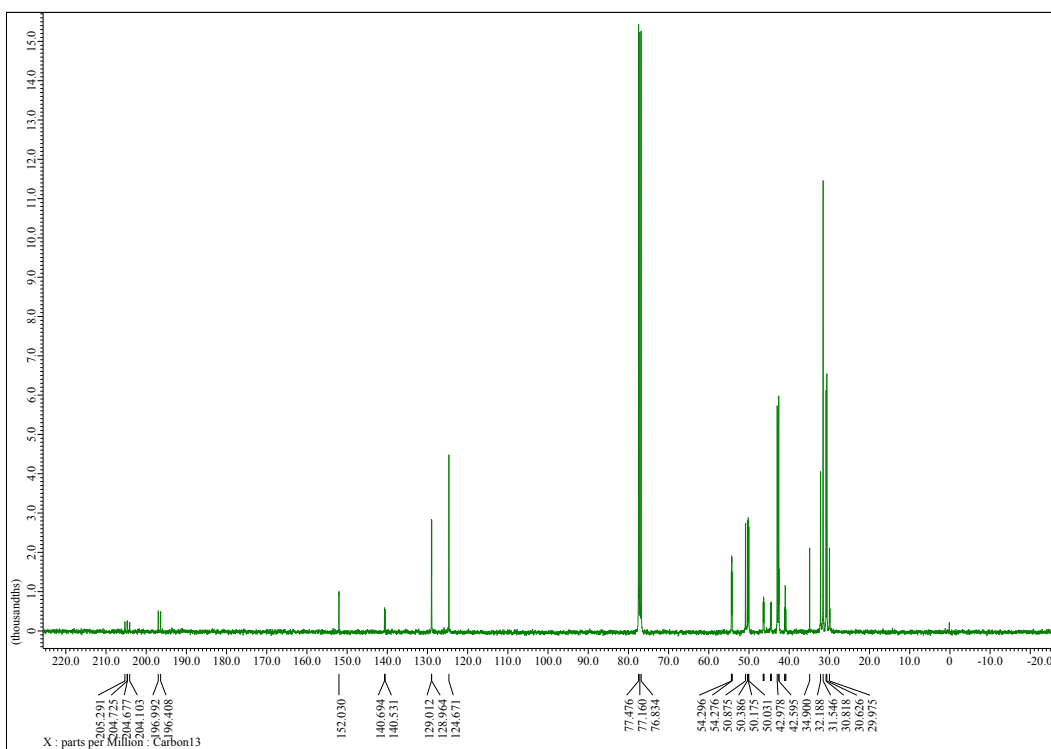

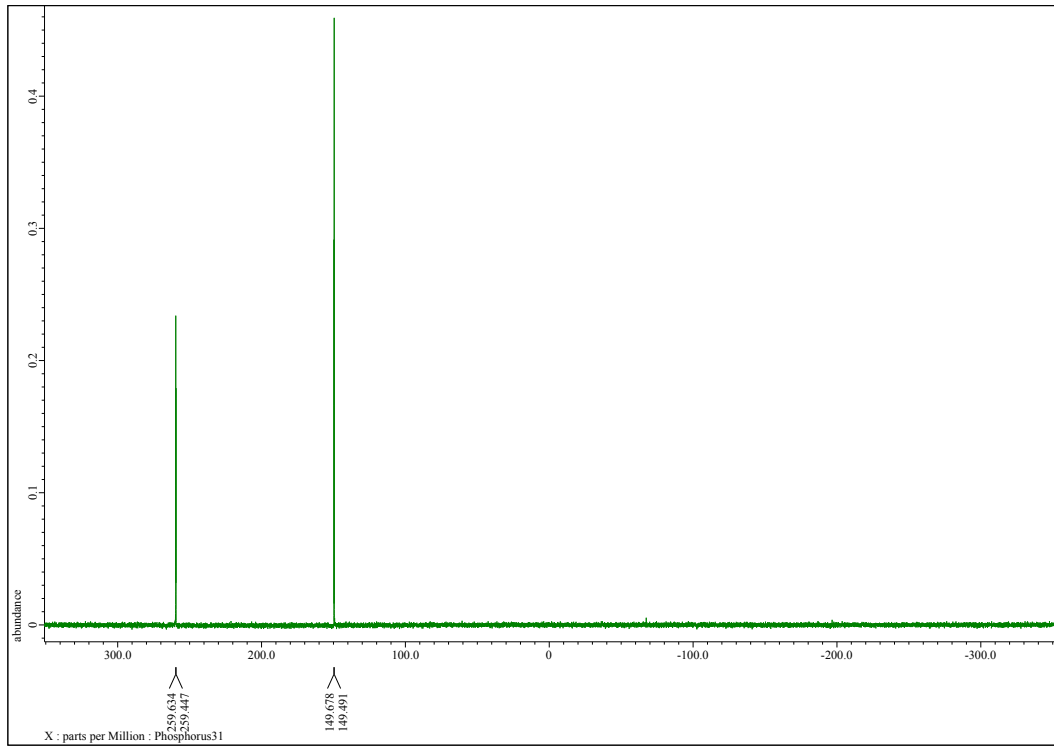

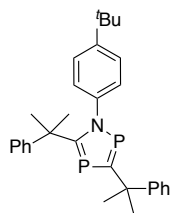

3p

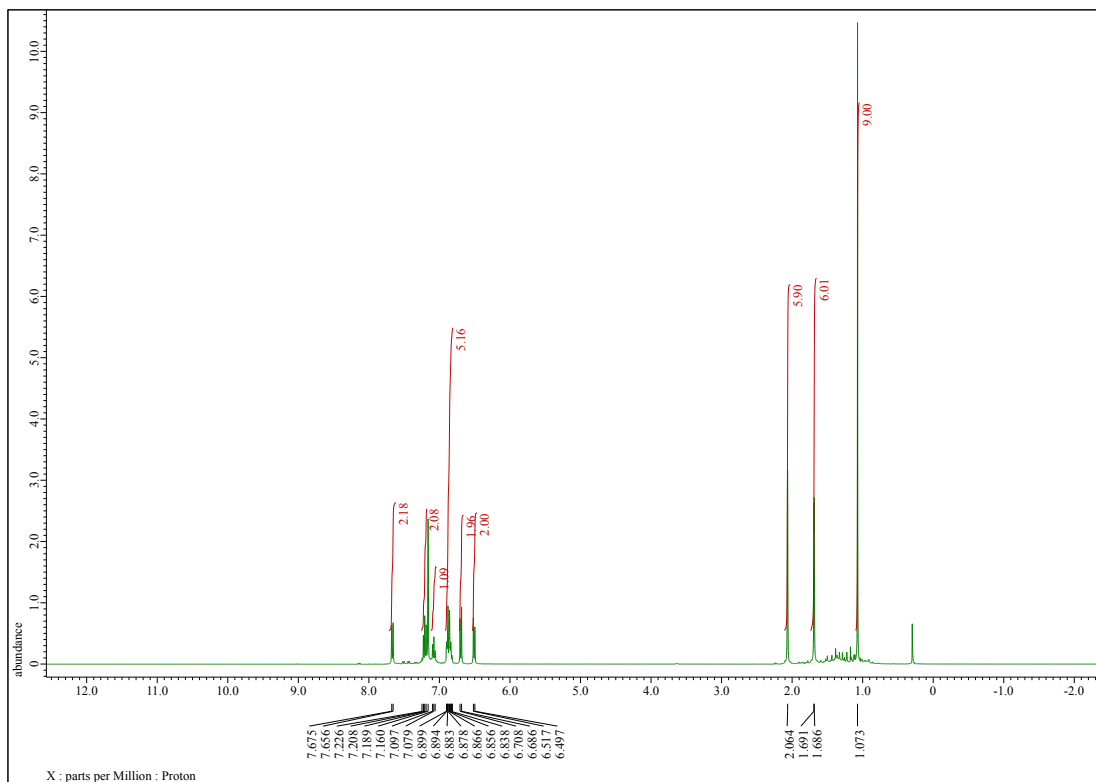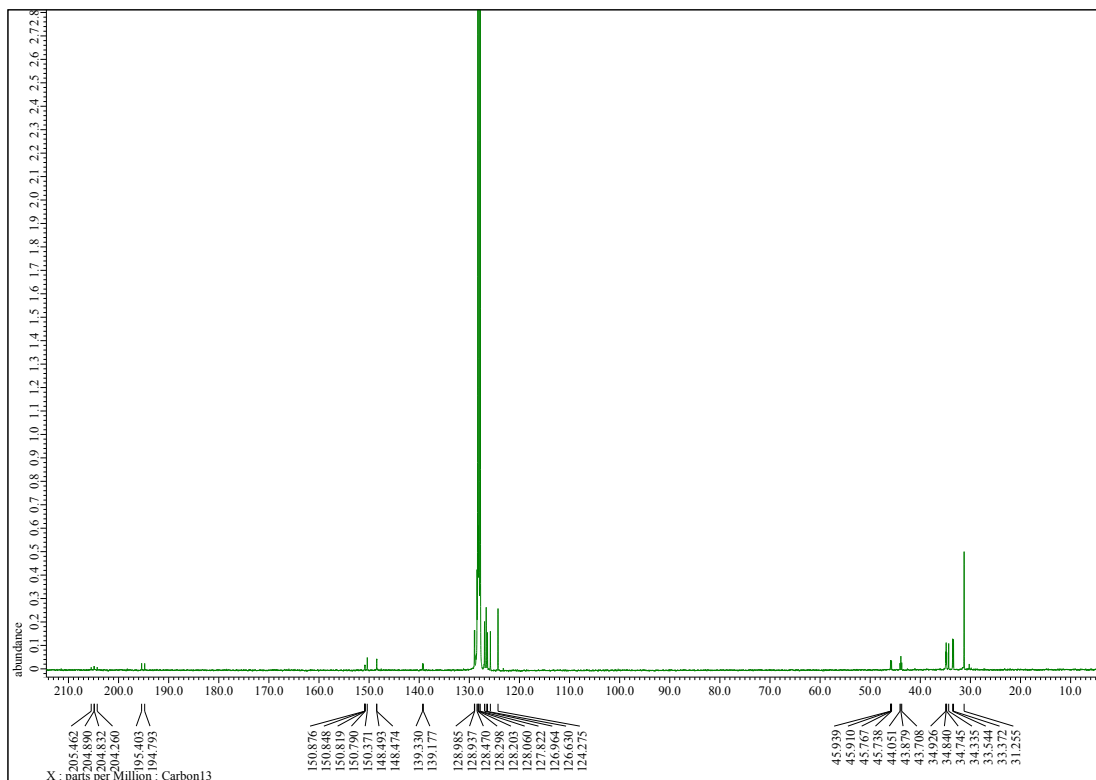

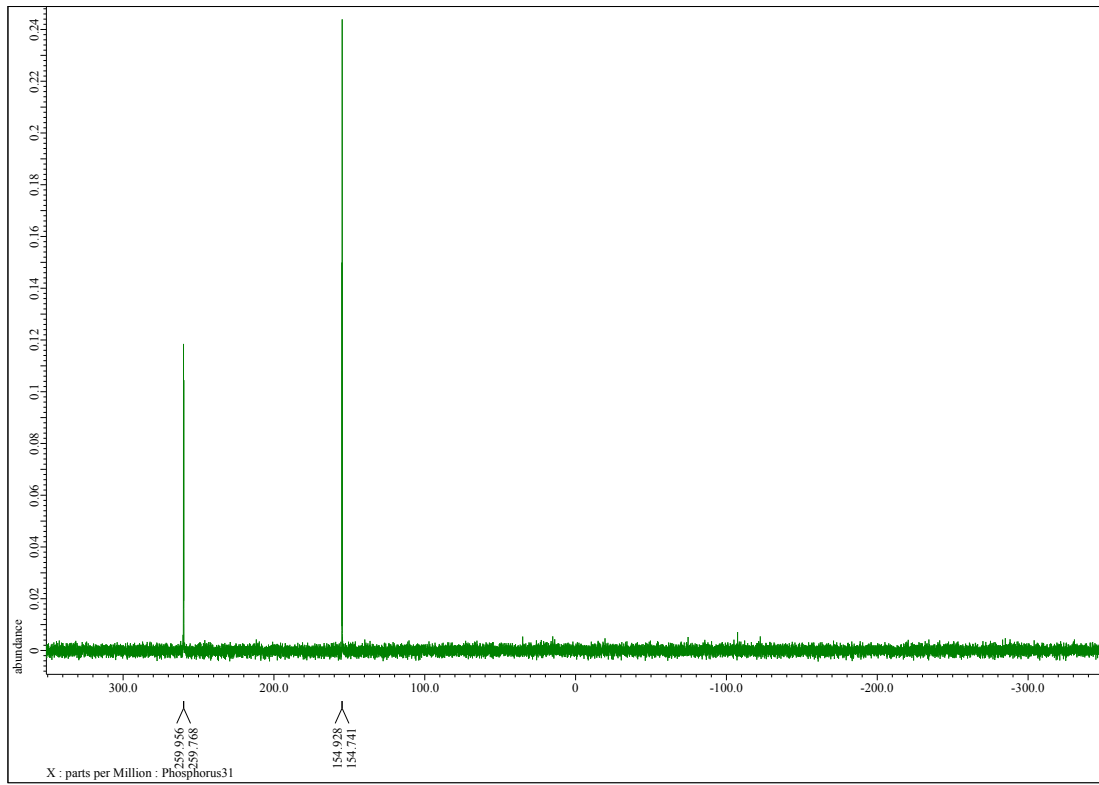

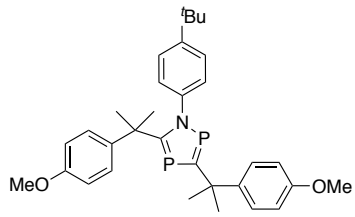

3q

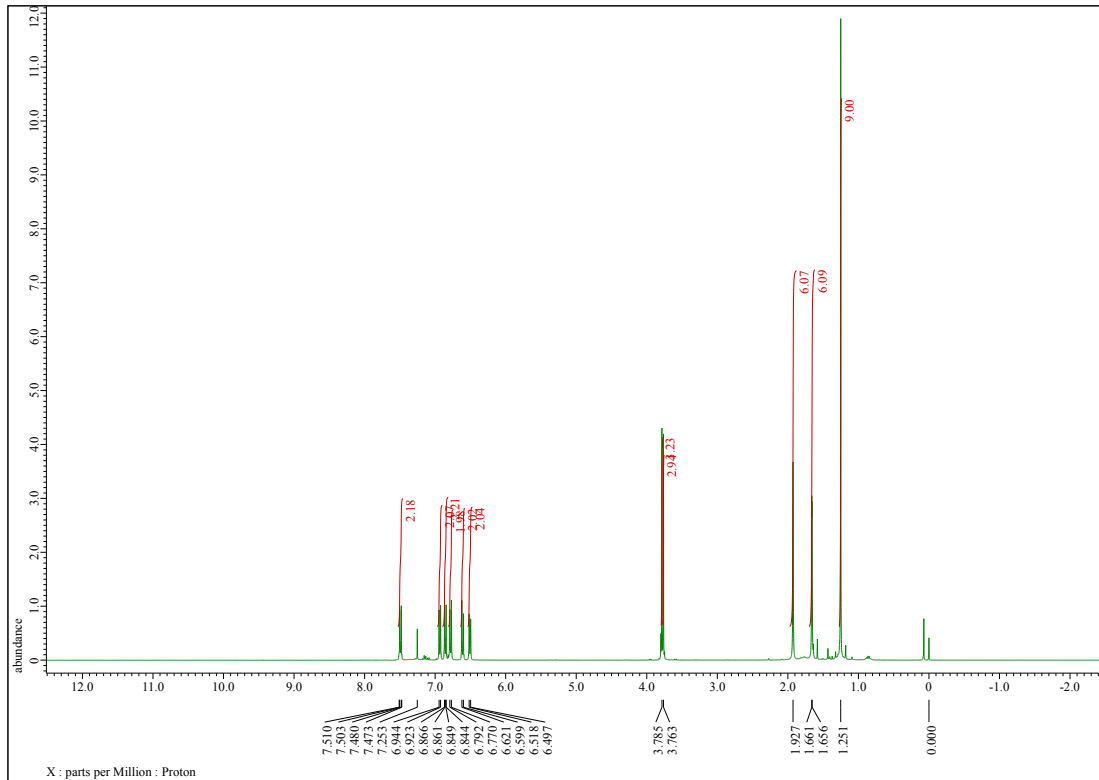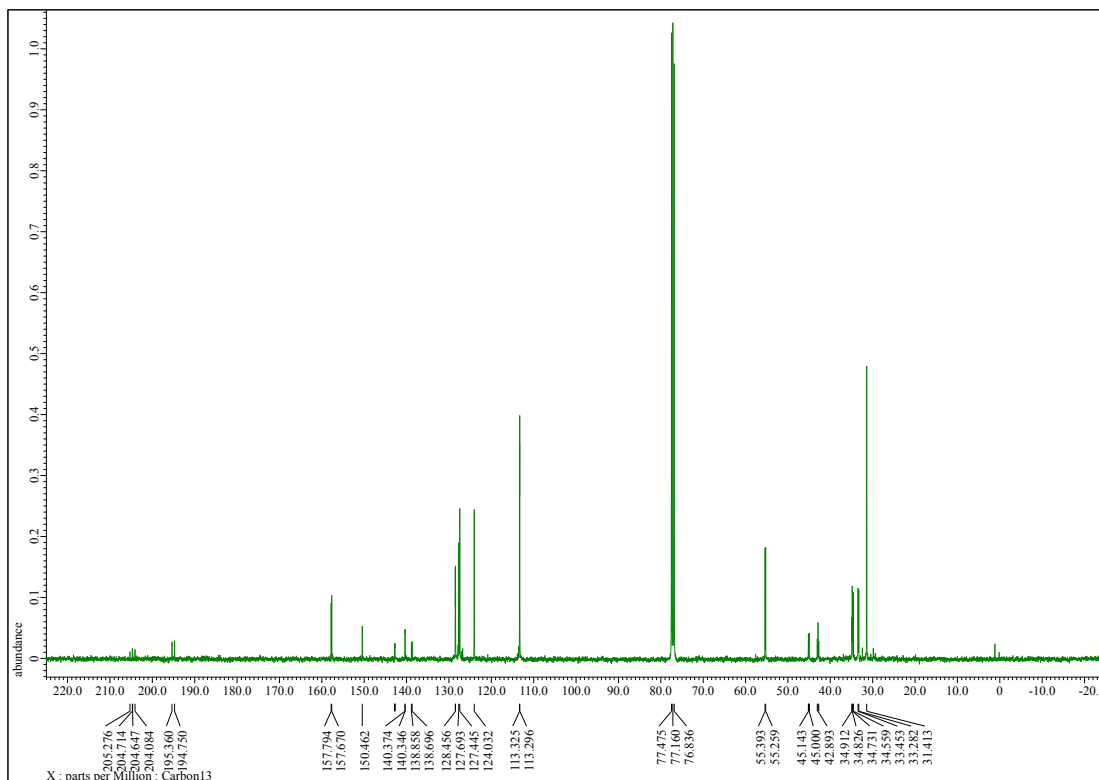

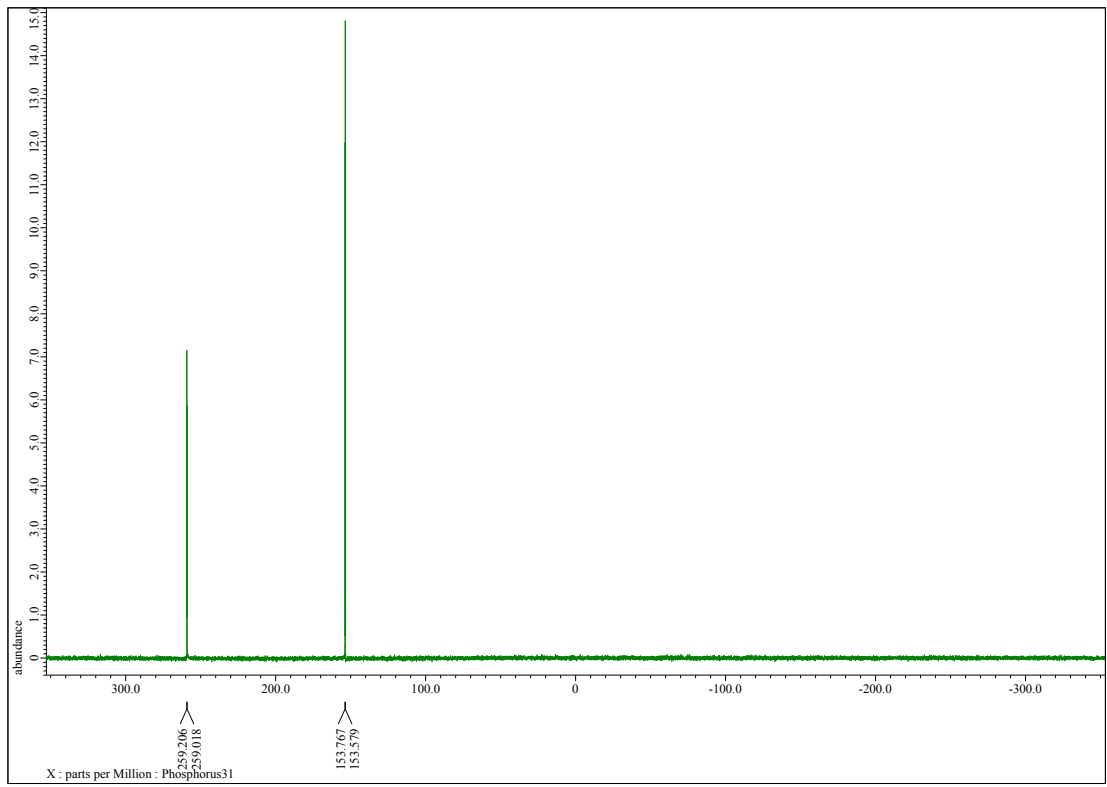

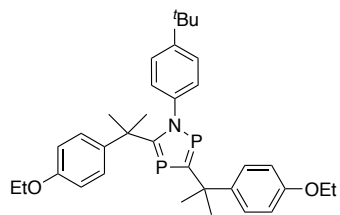

**3r**

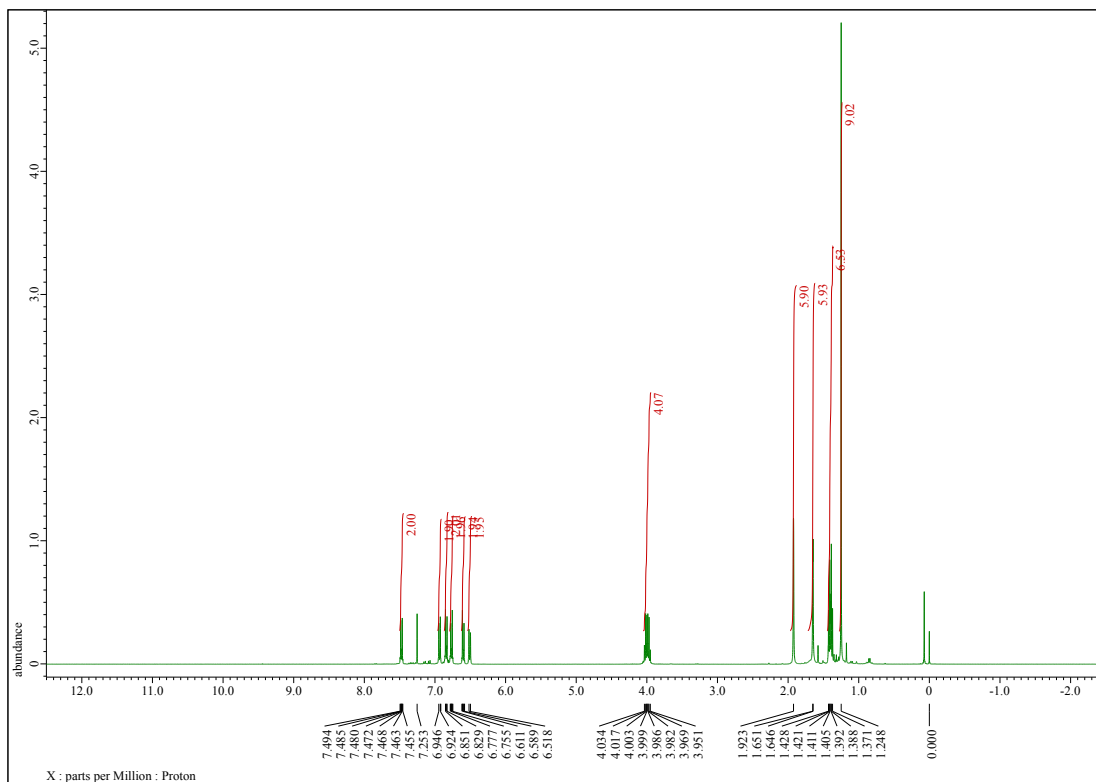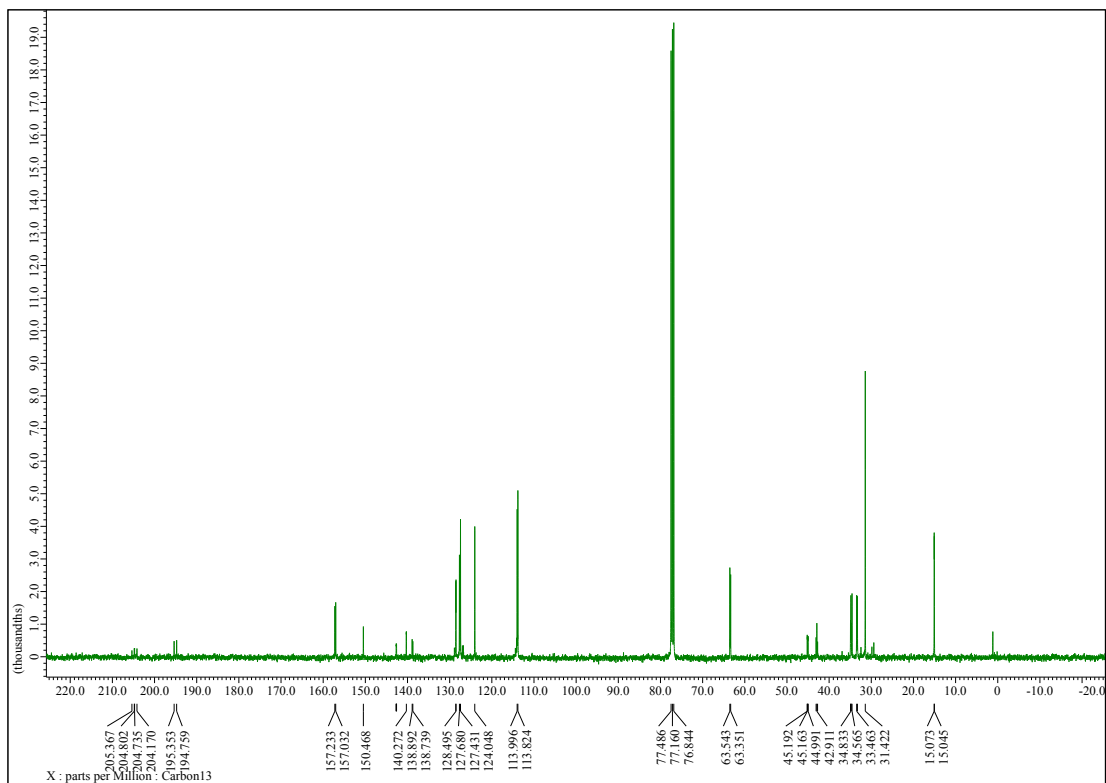

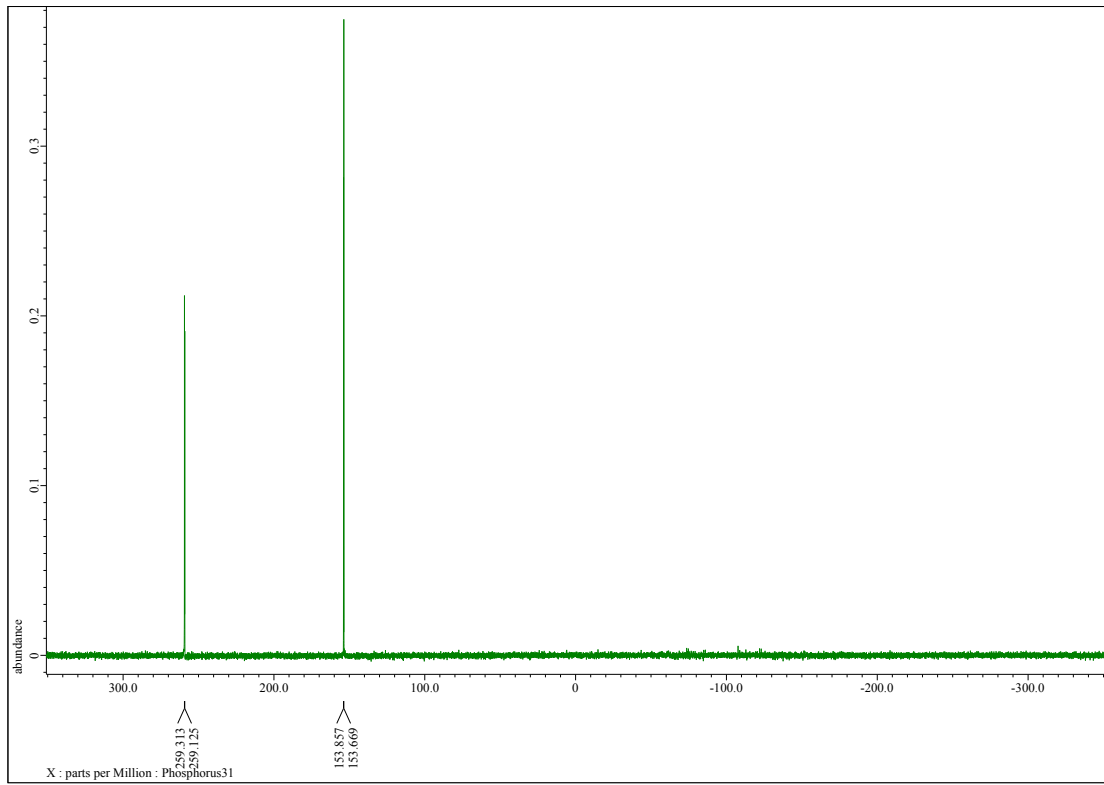



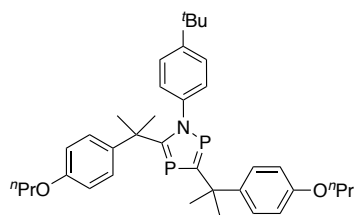

3s

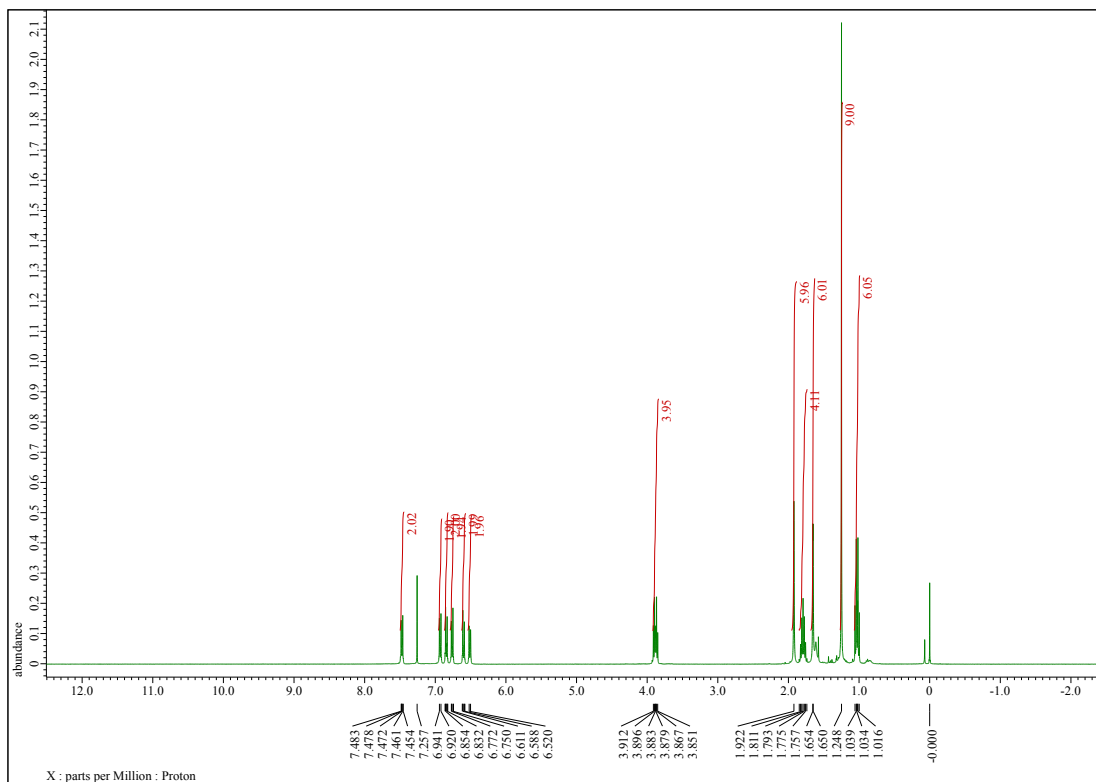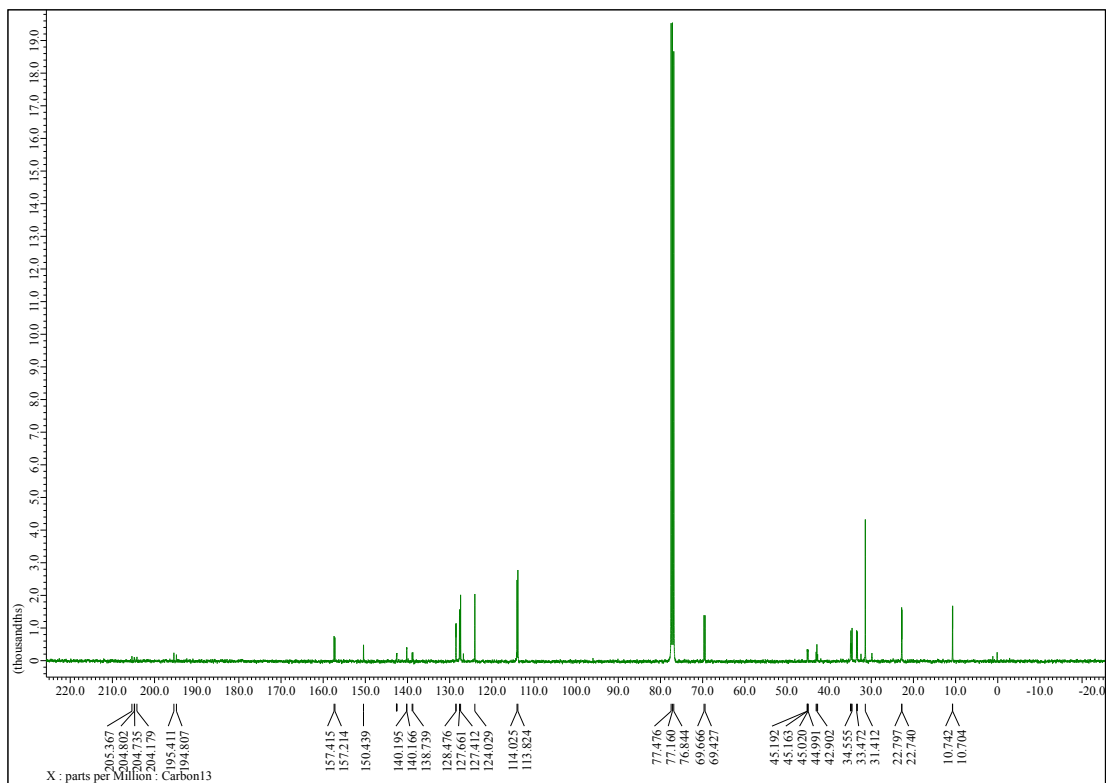

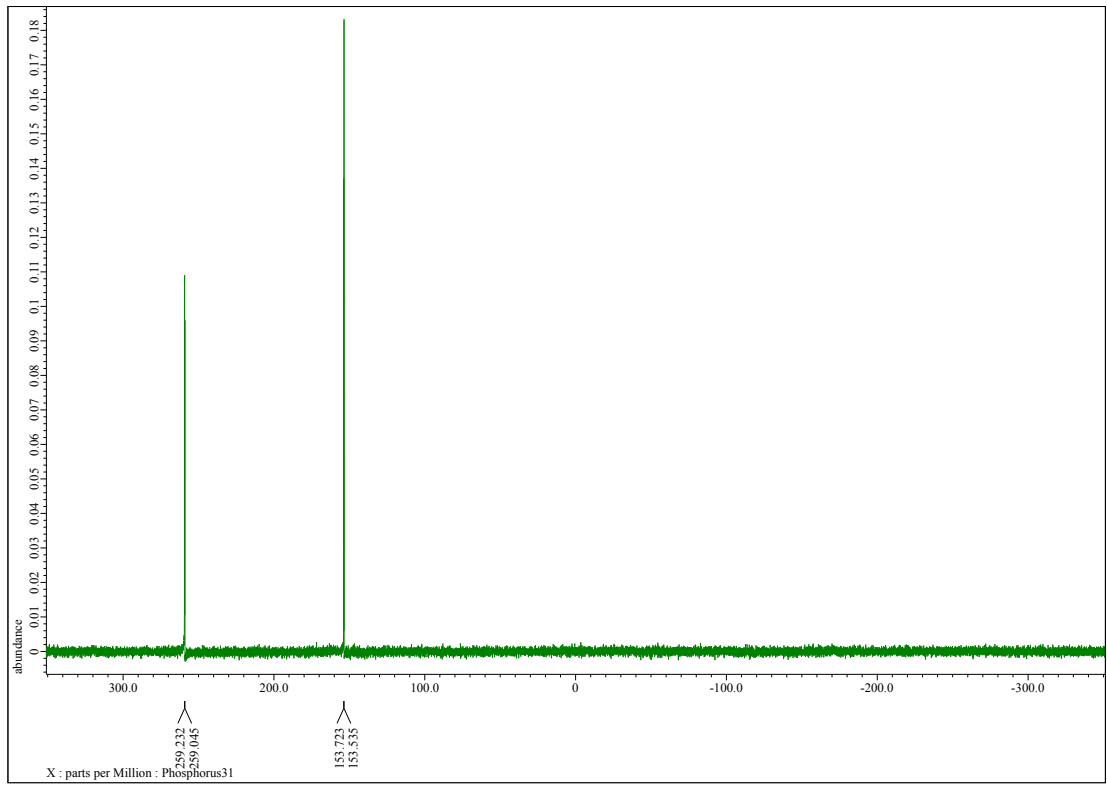

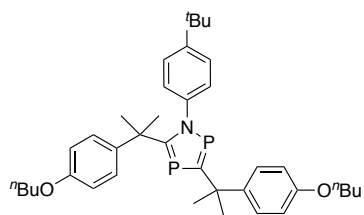

3t

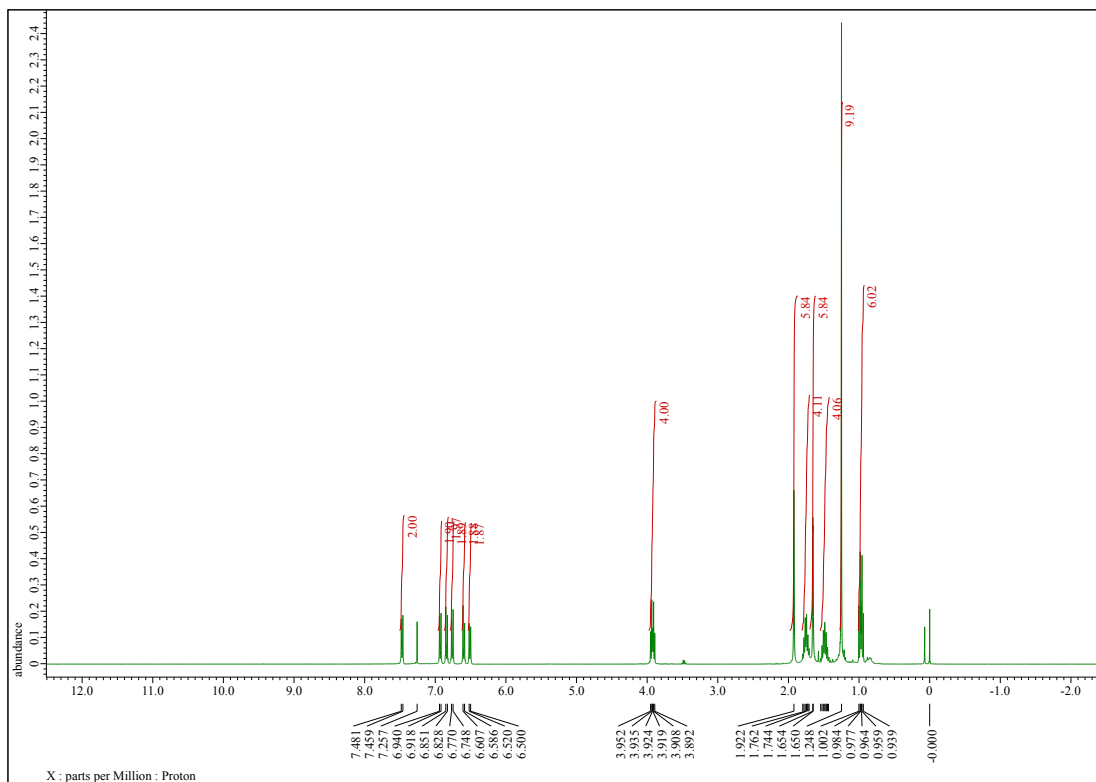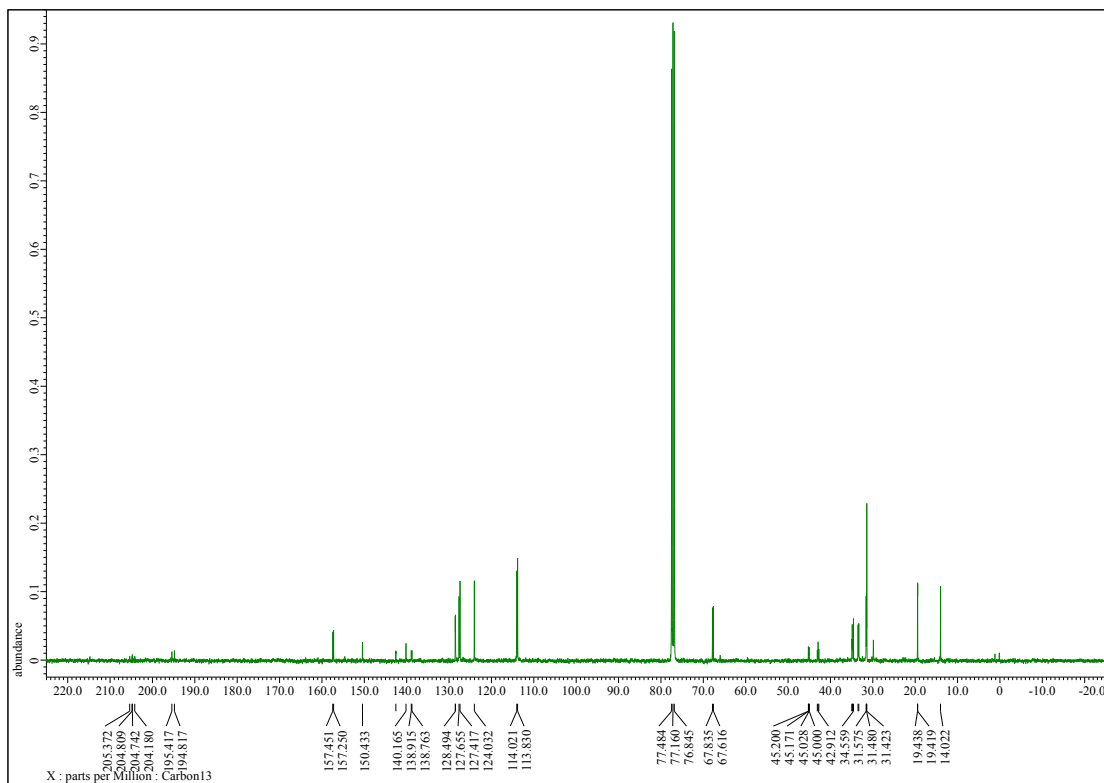

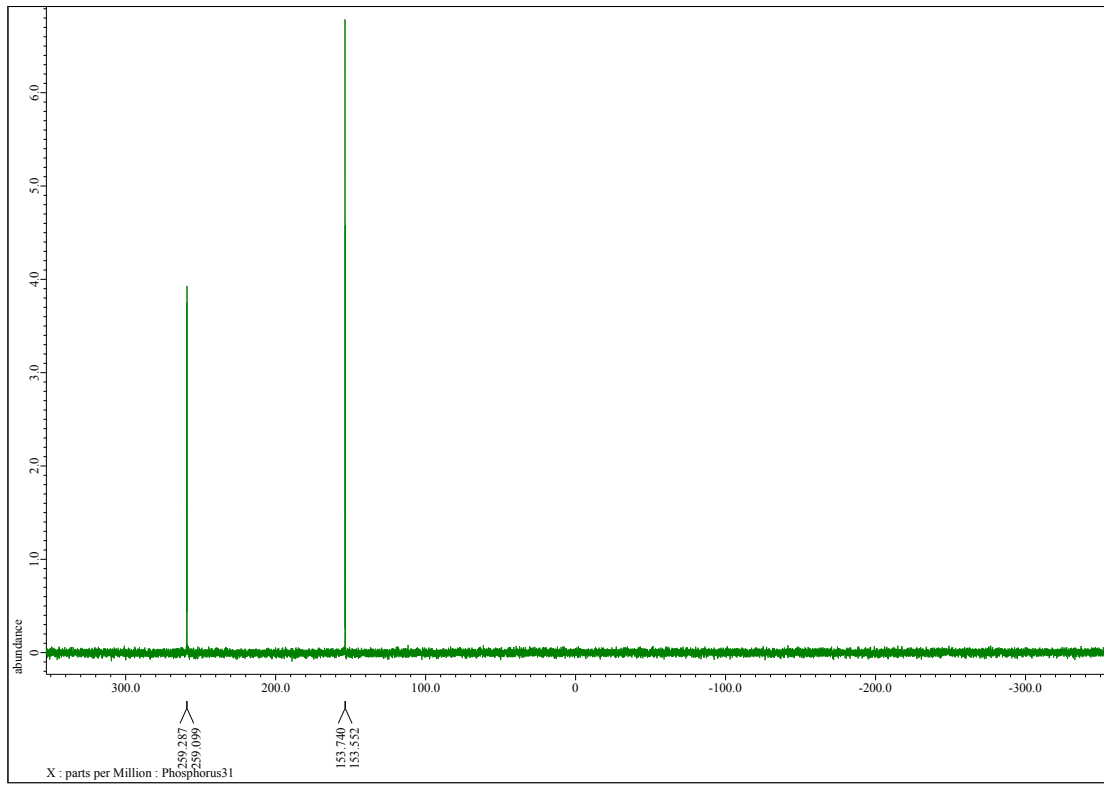

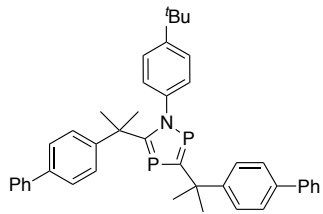

**3u**

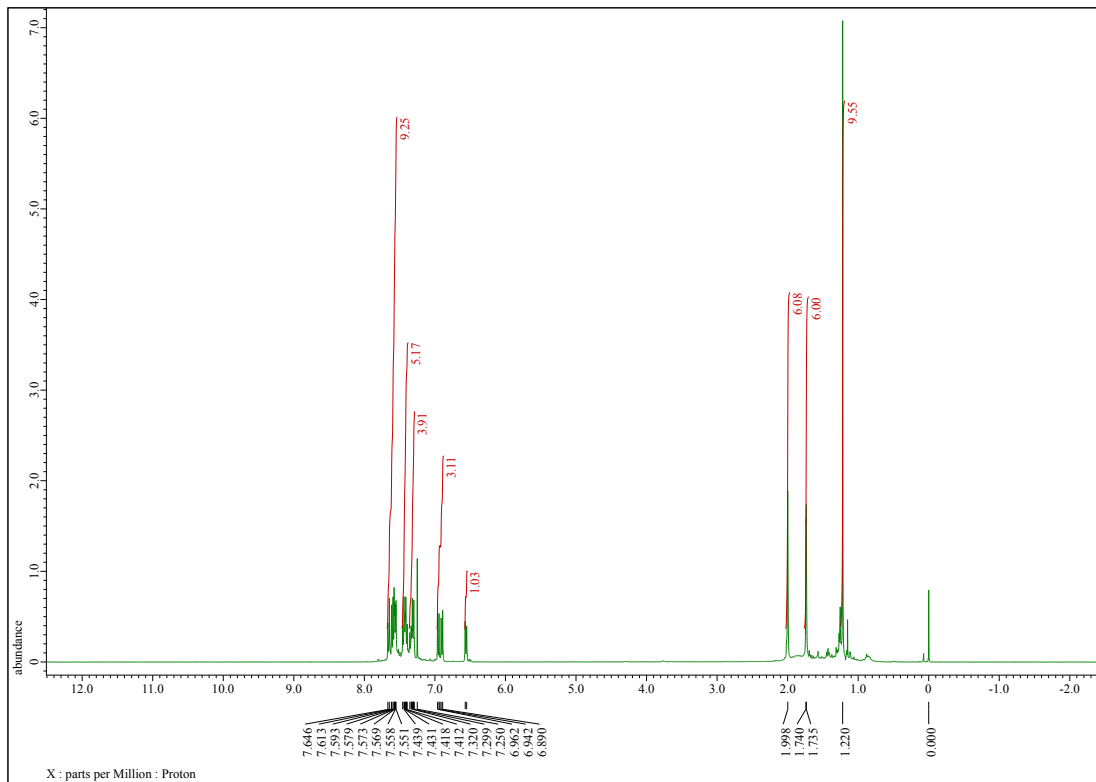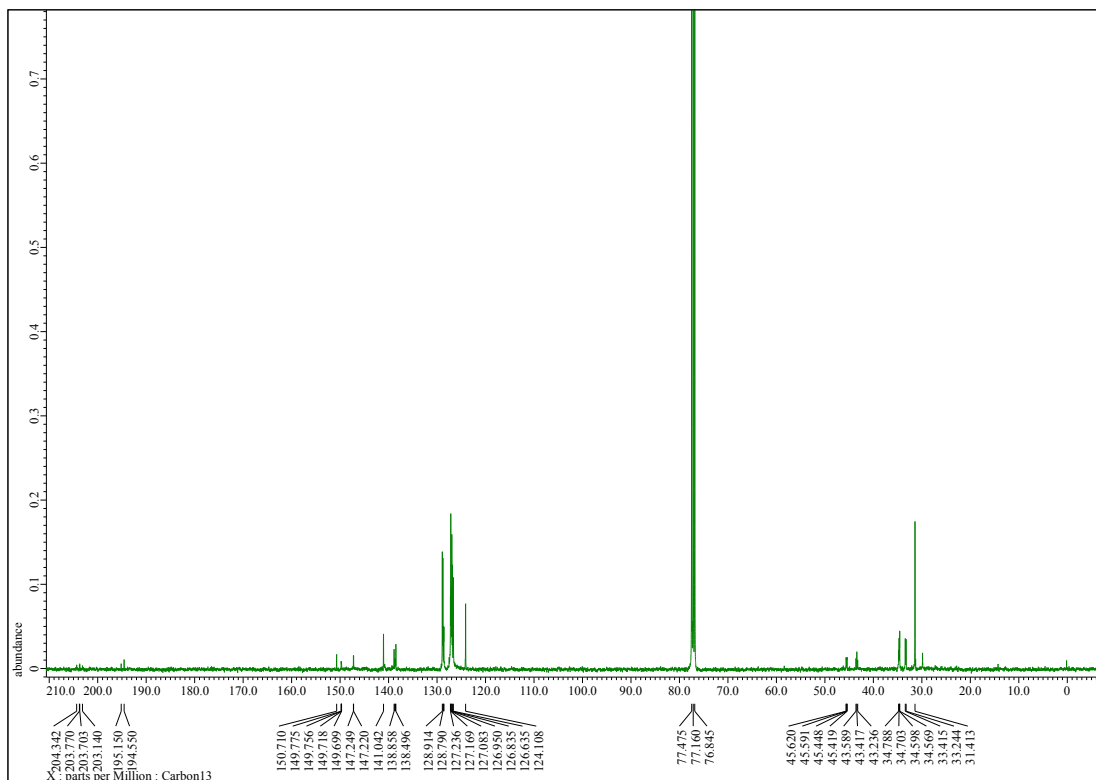

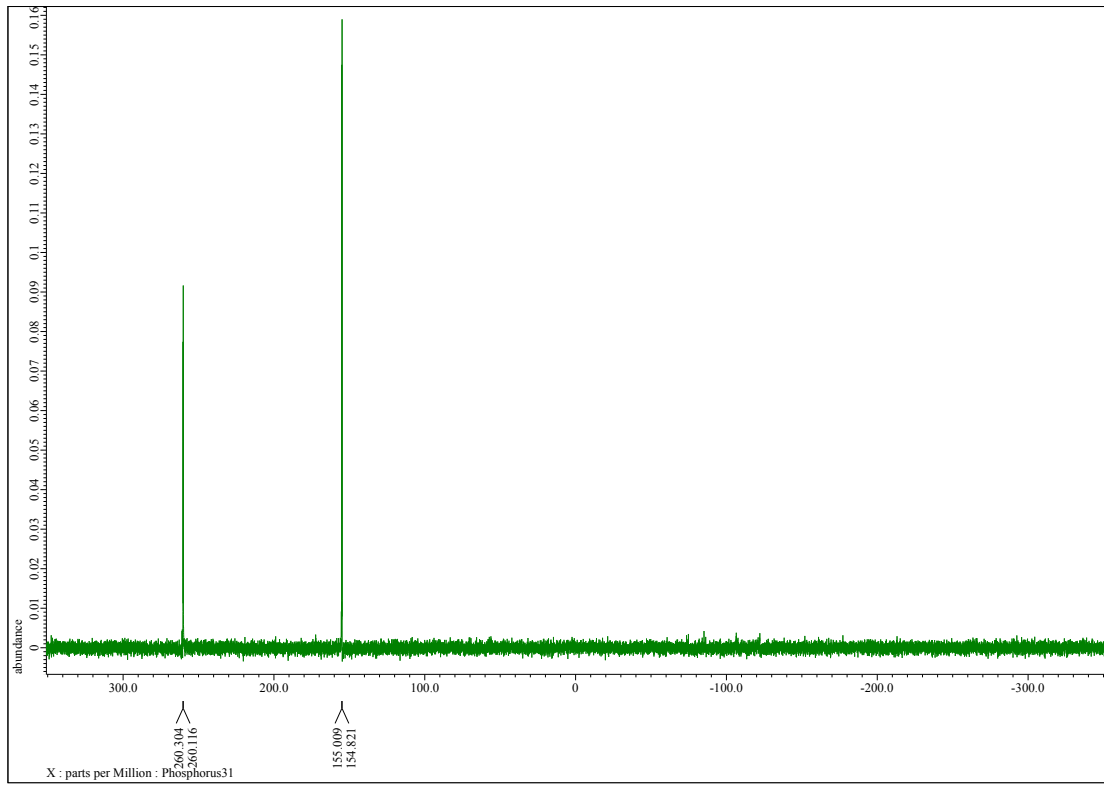

Supplement: d0ra02503h1.pdf [file d0ra02503h1.pdf]
